# Supplementary material for: C–F activation reactions at germylium ions: dehydrofluorination of fluoralkanes
Source: Royal Society of Chemistry journal article supplement (doi:10.1039/d0cc01420f), 2020-01-01
Supplement: d0cc01420f1.pdf [file d0cc01420f1.pdf]

Electronic Supplementary Information for:

## **C–F activation Reactions at Germylium Ions: Dehydrofluorination of Fluoralkanes**

M. Talavera, G. Meißner, S. G. Rachor, T. Braun\*

Department of Chemistry, Humboldt-Universität zu Berlin, Brook-Taylor-Str. 2, 12489 Berlin, Germany

|                                                                                |           |
|--------------------------------------------------------------------------------|-----------|
| <b>1. Materials and Methods .....</b>                                          | <b>2</b>  |
| <b>2. Synthesis of Germylium Ions .....</b>                                    | <b>2</b>  |
| <b>3. Stoichiometric C–F Bond Activation Reactions.....</b>                    | <b>6</b>  |
| <b>4. General Procedures for Catalytic C–F Bond Activation Reactions .....</b> | <b>7</b>  |
| <b>5. X-Ray Diffraction Analysis .....</b>                                     | <b>10</b> |
| <b>6. Mass and NMR spectra.....</b>                                            | <b>12</b> |
| <b>7. References .....</b>                                                     | <b>29</b> |

## 1. Materials and Methods

The samples were prepared in a glovebox and the reactions performed in JYoung NMR tubes using conventional Schlenk techniques. Benzene and hexane were dried over K-Solvona<sup>®</sup> and distilled before usage. *o*-Dichlorobenzene was stored over molecular sieve. All reagents were obtained from commercial sources and used as received.

NMR spectra were acquired at a Bruker DPX 300, Bruker AVANCE II 300 spectrometer at room temperature with tetramethylsilane as external standard. <sup>1</sup>H NMR and <sup>13</sup>C{<sup>1</sup>H} NMR chemical shifts ( $\delta$ ) were referenced to residual *o*-C<sub>6</sub>D<sub>4</sub>Cl<sub>2</sub> ( $\delta$  = 7.17 ppm and  $\delta$  = 132.6 ppm, respectively). <sup>19</sup>F NMR spectra were calibrated externally to CFC<sub>3</sub>; <sup>11</sup>B NMR spectra to external BF<sub>3</sub>·OEt<sub>2</sub> and <sup>31</sup>P{<sup>1</sup>H} NMR spectra to external 85% H<sub>3</sub>PO<sub>4</sub>. NMR assignments were supported by <sup>1</sup>H-<sup>1</sup>H COSY, <sup>1</sup>H-<sup>13</sup>C HMQC, <sup>1</sup>H-<sup>13</sup>C HMBC, <sup>1</sup>H{<sup>19</sup>F} and <sup>1</sup>H{<sup>31</sup>P} experiments.

LIFDI-TOF-MS was measured with a Micromass Q-TOF-2 mass spectrometer, equipped with a Linden LIFDI source (Linden CMS GmbH). GC-MS was measured with an Agilent 6890N gas-phase chromatograph (Agilent 19091S-433 Hewlett-Packard) with an Agilent 5973 Network mass selective detector at 70 eV.

## 2. Synthesis of Gernylium Ions

### Synthesis of [Et<sub>3</sub>Ge][B(C<sub>6</sub>F<sub>5</sub>)<sub>4</sub>] (1a)

[Ph<sub>3</sub>C][B(C<sub>6</sub>F<sub>5</sub>)<sub>4</sub>] (50.0 mg, 54  $\mu$ mol) and Et<sub>3</sub>GeH (8.7  $\mu$ L, 54  $\mu$ mol) were dissolved in C<sub>6</sub>D<sub>6</sub> (0.4 mL) and stirred for 5 min at room temperature. The colourless top phase was removed and the yellow bottom phase was washed with C<sub>6</sub>D<sub>6</sub> (3 x 0.3 mL). For characterisation, the isolated yellow bottom phase was dissolved in *o*-C<sub>6</sub>D<sub>4</sub>Cl<sub>2</sub> (0.3 mL). A quantitative conversion of the starting materials based on the <sup>1</sup>H NMR spectrum yielded **1a**.

<sup>1</sup>H NMR (300 MHz, *o*-C<sub>6</sub>D<sub>4</sub>Cl<sub>2</sub>):  $\delta$  = 1.23-1.13 (m, 6H, CH<sub>2</sub>CH<sub>3</sub>); 1.12-1.02 (m, 9H, CH<sub>2</sub>CH<sub>3</sub>) ppm.

<sup>13</sup>C{<sup>1</sup>H} NMR (75 MHz, *o*-C<sub>6</sub>D<sub>4</sub>Cl<sub>2</sub>):  $\delta$  = 149.0 (dm, <sup>1</sup>J<sub>C,F</sub> = 240 Hz, CF); 138.8 (dm, <sup>1</sup>J<sub>C,F</sub> = 243 Hz, CF); 137.0 (dm, <sup>1</sup>J<sub>C,F</sub> = 244 Hz, CF); 14.5 (br s, CH<sub>2</sub>); 7.9 (s, CH<sub>3</sub>) ppm. The signal for the C<sub>ipso</sub> of the anion could not be observed due to overlapping with the solvent signals.

<sup>19</sup>F NMR (280 MHz, *o*-C<sub>6</sub>D<sub>4</sub>Cl<sub>2</sub>):  $\delta$  = -132.1 (m, 8F, CF); -162.5 (t, <sup>3</sup>J<sub>F,F</sub> = 21 Hz, 4F, *p*-CF); -166.4 (m, 8F, CF) ppm.

<sup>11</sup>B NMR (96 MHz, *o*-C<sub>6</sub>D<sub>4</sub>Cl<sub>2</sub>):  $\delta$  = -16.4 (s) ppm.

MS (LIFDI, *o*-C<sub>6</sub>H<sub>4</sub>Cl<sub>2</sub>): m/z = 161 [Et<sub>3</sub>Ge]<sup>+</sup>; 133 [Et<sub>2</sub>GeH]<sup>+</sup>

### Synthesis of [Ph<sub>3</sub>Ge][B(C<sub>6</sub>F<sub>5</sub>)<sub>4</sub>] (1b)

[Ph<sub>3</sub>C][B(C<sub>6</sub>F<sub>5</sub>)<sub>4</sub>] (50.0 mg, 54  $\mu$ mol) and Ph<sub>3</sub>GeH (16.5 mg, 54  $\mu$ mol) were dissolved in C<sub>6</sub>D<sub>6</sub> (0.4 mL) and stirred for 5 min at room temperature. The colourless top phase was removed and the yellow bottom phase was washed with C<sub>6</sub>D<sub>6</sub> (3 x 0.3 mL). For characterisation, the isolated yellow bottom phase was dissolved in *o*-C<sub>6</sub>D<sub>4</sub>Cl<sub>2</sub> (0.3 mL) and the formation of **1b** was observed. Note that formation of B(C<sub>6</sub>F<sub>5</sub>)<sub>3</sub> was also detected (18% based on the <sup>19</sup>F NMR spectrum).

**<sup>1</sup>H NMR** (300 MHz, *o*-C<sub>6</sub>D<sub>4</sub>Cl<sub>2</sub>):  $\delta$  = 7.82-7.68 (m, 9H, *Ph*); 7.68-7.56 (m, 6H, *Ph*) ppm.

**<sup>13</sup>C{<sup>1</sup>H} NMR** (75 MHz, *o*-C<sub>6</sub>D<sub>4</sub>Cl<sub>2</sub>):  $\delta$  = 149.0 (dm, <sup>1</sup>*J*<sub>C,F</sub> = 239 Hz, CF); 138.8 (dm, <sup>1</sup>*J*<sub>C,F</sub> = 244 Hz, CF); 136.9 (dm, <sup>1</sup>*J*<sub>C,F</sub> = 248 Hz, CF); 135.7 (s, C<sub>ar</sub>), 134.9 (s, C<sub>ipso</sub>); 130.2 (s, C<sub>ar</sub>) ppm. The signal for the C<sub>ipso</sub> of the anion and the remaining signal of the phenyl ligands could not be observed due to overlapping with the solvent signals.

**<sup>19</sup>F NMR** (280 MHz, *o*-C<sub>6</sub>D<sub>4</sub>Cl<sub>2</sub>):  $\delta$  = -131.3 (m, 8F, CF); -161.8 (t, <sup>3</sup>*J*<sub>F,F</sub> = 21 Hz, 4F, *p*-CF); -165.7 (m, 8F, CF) ppm.

**<sup>11</sup>B NMR** (96 MHz, *o*-C<sub>6</sub>D<sub>4</sub>Cl<sub>2</sub>):  $\delta$  = -16.3 (s) ppm.

**MS** (LIFDI, *o*-C<sub>6</sub>H<sub>4</sub>Cl<sub>2</sub>): *m/z* = 305 [Ph<sub>3</sub>Ge]<sup>+</sup>.

### Synthesis of [*n*Bu<sub>3</sub>Ge][B(C<sub>6</sub>F<sub>5</sub>)<sub>4</sub>] (**1c**)

[Ph<sub>3</sub>C][B(C<sub>6</sub>F<sub>5</sub>)<sub>4</sub>] (50.0 mg, 54  $\mu$ mol) and *n*Bu<sub>3</sub>GeH (13.9  $\mu$ L, 54  $\mu$ mol) were dissolved in C<sub>6</sub>D<sub>6</sub> (0.4 mL) and stirred for 5 min at room temperature. The colourless top phase was removed and the yellow bottom phase was washed with C<sub>6</sub>D<sub>6</sub> (3 x 0.3 mL). For characterisation, the isolated yellow bottom phase was dissolved in *o*-C<sub>6</sub>D<sub>4</sub>Cl<sub>2</sub> (0.3 mL). The quantitative conversion of the starting materials based on the <sup>1</sup>H NMR spectrum yielded **1c**.

**<sup>1</sup>H NMR** (300 MHz, *o*-C<sub>6</sub>D<sub>4</sub>Cl<sub>2</sub>):  $\delta$  = 1.57-1.47 (m, 12H, CH<sub>2</sub>CH<sub>2</sub>CH<sub>2</sub>CH<sub>3</sub>); 1.47-1.33 (m, 6H, CH<sub>2</sub>CH<sub>2</sub>CH<sub>2</sub>CH<sub>3</sub>); 1.02 (tm, <sup>3</sup>*J*<sub>H,H</sub> = 7.0 Hz, 9H, CH<sub>3</sub>) ppm.

**<sup>13</sup>C{<sup>1</sup>H} NMR** (75 MHz, *o*-C<sub>6</sub>D<sub>4</sub>Cl<sub>2</sub>):  $\delta$  = 148.9 (dm, <sup>1</sup>*J*<sub>C,F</sub> = 244 Hz, CF); 138.7 (dm, <sup>1</sup>*J*<sub>C,F</sub> = 243 Hz, CF); 136.8 (dm, <sup>1</sup>*J*<sub>C,F</sub> = 245 Hz, CF); 25.9 and 25.6 (s, CH<sub>2</sub>); 23.5 (br s, CH<sub>2</sub>); 13.2 (s, CH<sub>3</sub>) ppm. The signal for the C<sub>ipso</sub> of the anion could not be observed due to overlapping with the solvent signals.

**<sup>19</sup>F NMR** (280 MHz, *o*-C<sub>6</sub>D<sub>4</sub>Cl<sub>2</sub>):  $\delta$  = -131.7 (m, 8F, CF); -162.3 (t, <sup>3</sup>*J*<sub>F,F</sub> = 21 Hz, 4F, *p*-CF); -166.1 (m, 8F, CF) ppm.

**<sup>11</sup>B NMR** (96 MHz, *o*-C<sub>6</sub>D<sub>4</sub>Cl<sub>2</sub>):  $\delta$  = -16.2 (s) ppm.

**MS** (LIFDI, *o*-C<sub>6</sub>H<sub>4</sub>Cl<sub>2</sub>): *m/z* = 245 [*n*Bu<sub>3</sub>Ge]<sup>+</sup>; 189 [*n*Bu<sub>2</sub>GeH]<sup>+</sup>.

### Reaction of the germylium ion **1a** with Et<sub>3</sub>GeH: Formation of **2a**

Reaction using 1 equivalent of Et<sub>3</sub>GeH:

[Ph<sub>3</sub>C][B(C<sub>6</sub>F<sub>5</sub>)<sub>4</sub>] (50.0 mg, 54  $\mu$ mol) and Et<sub>3</sub>GeH (9.8  $\mu$ L, 59  $\mu$ mol) were dissolved in C<sub>6</sub>D<sub>6</sub> (0.4 mL) and stirred for 5 min at room temperature. The colourless top phase was removed and the yellow bottom phase was washed with C<sub>6</sub>D<sub>6</sub> (3 x 0.3 mL). A second equivalent Et<sub>3</sub>GeH (9.8  $\mu$ L, 59  $\mu$ mol) in C<sub>6</sub>D<sub>6</sub> (0.3 mL) was added to the germylium ion **1a** and the bottom phase turned colourless. For characterisation, the isolated colourless bottom phase was dissolved in *o*-C<sub>6</sub>D<sub>4</sub>Cl<sub>2</sub> (0.3 mL). The quantitative conversion of **1a** based on the <sup>1</sup>H NMR spectrum yielded [Et<sub>3</sub>Ge-H-GeEt<sub>3</sub>][B(C<sub>6</sub>F<sub>5</sub>)<sub>4</sub>] (**2a**).

**<sup>1</sup>H NMR** (300 MHz, *o*-C<sub>6</sub>D<sub>4</sub>Cl<sub>2</sub>):  $\delta$  = 2.08 (s br, 1H, Ge-H-Ge); 1.50-1.06 (m, 30H, CH<sub>2</sub>CH<sub>3</sub>) ppm.

**<sup>13</sup>C{<sup>1</sup>H} NMR** (75 MHz, *o*-C<sub>6</sub>D<sub>4</sub>Cl<sub>2</sub>):  $\delta$  = 149.0 (dm, <sup>1</sup>*J*<sub>C,F</sub> = 242 Hz, CF); 138.8 (dm, <sup>1</sup>*J*<sub>C,F</sub> = 245 Hz, CF); 136.9 (dm, <sup>1</sup>*J*<sub>C,F</sub> = 244 Hz, CF); 9.7 (br s, CH<sub>2</sub>); 9.0 (s br, CH<sub>3</sub>) ppm. The signal of the C<sub>ipso</sub> of the anion could not be observed due to overlapping with the solvent signals.

**<sup>19</sup>F NMR** (280 MHz, *o*-C<sub>6</sub>D<sub>4</sub>Cl<sub>2</sub>):  $\delta$  = -131.8 (m, 8F, CF); -162.4 (t, <sup>3</sup>*J*<sub>F,F</sub> = 21 Hz, 4F, *p*-CF); -166.2 (m, 8F, CF) ppm.

**<sup>11</sup>B NMR** (96 MHz, *o*-C<sub>6</sub>D<sub>4</sub>Cl<sub>2</sub>):  $\delta$  = -16.1 (s) ppm.

Reaction using different equivalents of Et<sub>3</sub>GeH:

Et<sub>3</sub>GeH (5  $\mu$ L, 32  $\mu$ mol) was added to the solution of **2a** (32  $\mu$ mol of trityl salt) in *o*-C<sub>6</sub>D<sub>4</sub>Cl<sub>2</sub> and the mixture stirred for 5 min at room temperature. <sup>1</sup>H NMR spectrum confirmed the consumption of the Et<sub>3</sub>GeH. Then, more Et<sub>3</sub>GeH (8  $\mu$ L, 50  $\mu$ mol) was added to the solution. NMR data confirmed the formation of GeEt<sub>4</sub> and traces of Et<sub>2</sub>GeH<sub>2</sub>.

#### Reaction of the germylium ion **1b** with Ph<sub>3</sub>GeH: Formation of **2b**

[Ph<sub>3</sub>C][B(C<sub>6</sub>F<sub>5</sub>)<sub>4</sub>] (50.0 mg, 54  $\mu$ mol) and Ph<sub>3</sub>GeH (16.5 mg, 54  $\mu$ mol) were dissolved in C<sub>6</sub>D<sub>6</sub> (0.4 mL) and stirred for 5 min at room temperature. The colourless top phase was removed and the yellow bottom phase was washed with C<sub>6</sub>D<sub>6</sub> (3 x 0.3 mL). A second equivalent Ph<sub>3</sub>GeH (16.5 mg, 54  $\mu$ mol) in C<sub>6</sub>D<sub>6</sub> (0.3 mL) was added to the germylium ion **1b** and the bottom phase turned colourless. For characterisation, the isolated colourless bottom phase corresponding to [Ph<sub>3</sub>Ge-H-GePh<sub>3</sub>][B(C<sub>6</sub>F<sub>5</sub>)<sub>4</sub>] (**2b**) was dissolved in *o*-C<sub>6</sub>D<sub>4</sub>Cl<sub>2</sub> (0.3 mL). Note that formation of B(C<sub>6</sub>F<sub>5</sub>)<sub>3</sub> was also observed.

<sup>1</sup>H NMR (300 MHz, *o*-C<sub>6</sub>D<sub>4</sub>Cl<sub>2</sub>):  $\delta$  = 7.75-7.61 (m, 9H, H<sub>ar</sub>); 7.61-7.51 (m, 6H, H<sub>ar</sub>); 5.40 (s br, 1H, Ge-H-Ge) ppm.

<sup>13</sup>C{<sup>1</sup>H} NMR (75 MHz, *o*-C<sub>6</sub>D<sub>4</sub>Cl<sub>2</sub>):  $\delta$  = 148.9 (dm, <sup>1</sup>J<sub>C,F</sub> = 240 Hz, CF); 138.6 (dm, <sup>1</sup>J<sub>C,F</sub> = 243 Hz, CF); 136.8 (dm, <sup>1</sup>J<sub>C,F</sub> = 242 Hz, CF); 135.5 (s, C<sub>ar</sub>); 129.1 (s, C<sub>ar</sub>) ppm. The signal for the C<sub>ipso</sub> of the anion and the remaining signals of the phenyl ligands could not be observed due to overlapping with the solvent signals and with the signals corresponding to B(C<sub>6</sub>F<sub>5</sub>)<sub>3</sub>.

<sup>19</sup>F NMR (280 MHz, *o*-C<sub>6</sub>D<sub>4</sub>Cl<sub>2</sub>):  $\delta$  = -131.7 (m, 8F, CF); -162.2 (t, <sup>3</sup>J<sub>F,F</sub> = 21 Hz, 4F, *p*-CF); -166.1 (m, 8F, CF) ppm.

<sup>11</sup>B NMR (96 MHz, *o*-C<sub>6</sub>D<sub>4</sub>Cl<sub>2</sub>):  $\delta$  = -16.1 (s) ppm.

#### Reaction of the germylium ion **1c** with *n*Bu<sub>3</sub>GeH: Formation of **2c**

[Ph<sub>3</sub>C][B(C<sub>6</sub>F<sub>5</sub>)<sub>4</sub>] (50.0 mg, 54  $\mu$ mol) and *n*Bu<sub>3</sub>GeH (13.9  $\mu$ L, 54  $\mu$ mol) were dissolved in C<sub>6</sub>D<sub>6</sub> (0.4 mL) and stirred for 5 min at room temperature. The colourless top phase was removed and the yellow bottom phase was washed with benzene (3 x 0.3 mL). A second equivalent *n*Bu<sub>3</sub>GeH (13.9  $\mu$ L, 54  $\mu$ mol) in C<sub>6</sub>D<sub>6</sub> (0.3 mL) was added to the germylium ion **1c** and the bottom phase turned colourless. For characterisation, the isolated colourless bottom phase was dissolved in *o*-C<sub>6</sub>D<sub>4</sub>Cl<sub>2</sub> (0.3 mL). The quantitative conversion of the starting materials based on the <sup>1</sup>H NMR spectrum yielded [*n*Bu<sub>3</sub>Ge-H-Ge*n*Bu<sub>3</sub>][B(C<sub>6</sub>F<sub>5</sub>)<sub>4</sub>] (**2c**).

<sup>1</sup>H NMR (300 MHz, *o*-C<sub>6</sub>D<sub>4</sub>Cl<sub>2</sub>):  $\delta$  = 1.97 (s br, 1H, Ge-H-Ge); 1.75-1.42 (m, 36H, CH<sub>2</sub>CH<sub>2</sub>CH<sub>2</sub>CH<sub>3</sub>); 1.09 (tm, <sup>3</sup>J<sub>H,H</sub> = 7.1 Hz, 18H, CH<sub>3</sub>) ppm.

<sup>13</sup>C{<sup>1</sup>H} NMR (75 MHz, *o*-C<sub>6</sub>D<sub>4</sub>Cl<sub>2</sub>):  $\delta$  = 148.9 (dm, <sup>1</sup>J<sub>C,F</sub> = 242 Hz, CF); 138.8 (dm, <sup>1</sup>J<sub>C,F</sub> = 244 Hz, CF); 136.9 (dm, <sup>1</sup>J<sub>C,F</sub> = 244 Hz, CF); 27.4, 26.1 and 18.1 (all s, CH<sub>2</sub>); 13.6 (s, CH<sub>3</sub>) ppm. The signal of the C<sub>ipso</sub> of the anion could not be observed due to overlapping with the solvent signals.

<sup>19</sup>F NMR (280 MHz, *o*-C<sub>6</sub>D<sub>4</sub>Cl<sub>2</sub>):  $\delta$  = -131.7 (m, 8F, CF); -162.5 (t, <sup>3</sup>J<sub>F,F</sub> = 21 Hz, 4F, *p*-CF); -166.2 (m, 8F, CF) ppm.

<sup>11</sup>B NMR (96 MHz, *o*-C<sub>6</sub>D<sub>4</sub>Cl<sub>2</sub>):  $\delta$  = -16.2 (s) ppm.

### Synthesis of [Et<sub>3</sub>Ge-OH<sub>2</sub>][B(C<sub>6</sub>F<sub>5</sub>)<sub>4</sub>] (**3**)

Degassed H<sub>2</sub>O (1  $\mu$ L, 55  $\mu$ mol) was added to a solution of [Et<sub>3</sub>Ge][B(C<sub>6</sub>F<sub>5</sub>)<sub>4</sub>] (43  $\mu$ mol) in *o*-C<sub>6</sub>D<sub>4</sub>Cl<sub>2</sub> (0.4 mL) and stirred for 5 min at room temperature. The quantitative conversion of the germylium ion yielded compound **3**. Crystals were obtained by adding hexane (0.4 mL) to a solution of **3** in *o*-C<sub>6</sub>H<sub>4</sub>Cl<sub>2</sub> (0.2 mL).

<sup>1</sup>H NMR (300 MHz, *o*-C<sub>6</sub>D<sub>4</sub>Cl<sub>2</sub>):  $\delta$  = 5.1 (s, vbr, OH<sub>2</sub>); 1.33-1.12 (m, CH<sub>2</sub>CH<sub>3</sub>) ppm.

<sup>19</sup>F NMR (280 MHz, *o*-C<sub>6</sub>D<sub>4</sub>Cl<sub>2</sub>):  $\delta$  = -131.4 (m, 8F, CF); -162.0 (t, <sup>3</sup>J<sub>F,F</sub> = 21 Hz, 4F, *p*-CF); -165.8 (m, 8F, CF) ppm.

### Synthesis of [Et<sub>3</sub>Ge-PEt<sub>3</sub>][B(C<sub>6</sub>F<sub>5</sub>)<sub>4</sub>] (**4a**)

PEt<sub>3</sub> (5  $\mu$ L, 35  $\mu$ mol) was added to a solution of *in situ* synthesized [Et<sub>3</sub>Ge][B(C<sub>6</sub>F<sub>5</sub>)<sub>4</sub>] (32  $\mu$ mol of [Ph<sub>3</sub>C][B(C<sub>6</sub>F<sub>5</sub>)<sub>4</sub>]) in *o*-C<sub>6</sub>D<sub>4</sub>Cl<sub>2</sub> (0.4 mL) and the reaction mixture was stirred for 5 min at room temperature. Then, the excess of triethylphosphine was removed in vacuum, and the oily product **4a** obtained in a quantitative conversion (based on the <sup>1</sup>H and <sup>31</sup>P{<sup>1</sup>H} NMR spectra) was dissolved in *o*-C<sub>6</sub>D<sub>4</sub>Cl<sub>2</sub> for characterisation.

<sup>31</sup>P{<sup>1</sup>H} NMR (121 MHz, *o*-C<sub>6</sub>D<sub>4</sub>Cl<sub>2</sub>):  $\delta$  = 1.94 (s, PEt<sub>3</sub>) ppm.

<sup>1</sup>H NMR (300 MHz, *o*-C<sub>6</sub>D<sub>4</sub>Cl<sub>2</sub>):  $\delta$  = 1.83 (dq, <sup>2</sup>J<sub>H,P</sub> = 11.4 Hz, 6H, CH<sub>2</sub>P); 1.31-1.01 (m, 24H, GeCH<sub>2</sub>CH<sub>3</sub> + CH<sub>3</sub>CH<sub>2</sub>P) ppm.

<sup>13</sup>C{<sup>1</sup>H} NMR (75 MHz, *o*-C<sub>6</sub>D<sub>4</sub>Cl<sub>2</sub>):  $\delta$  = 148.9 (dm, <sup>1</sup>J<sub>C,F</sub> = 238 Hz, CF); 138.8 (dm, <sup>1</sup>J<sub>C,F</sub> = 246 Hz, CF); 136.9 (dm, <sup>1</sup>J<sub>C,F</sub> = 245 Hz, CF); 18.5 (d, <sup>1</sup>J<sub>C,P</sub> = 64 Hz, CH<sub>2</sub>P); 8.3, 7.6, 6.8 (all s, CH<sub>3</sub>CH<sub>2</sub>Ge + CH<sub>3</sub>CH<sub>2</sub>P) ppm. The signal for the C<sub>ipso</sub> of the anion could not be observed due to overlapping with the solvent signals.

<sup>19</sup>F NMR (280 MHz, *o*-C<sub>6</sub>D<sub>4</sub>Cl<sub>2</sub>):  $\delta$  = -131.8 (m, 8F, CF); -162.3 (t, <sup>3</sup>J<sub>F,F</sub> = 21 Hz, 4F, *p*-CF); -166.1 (m, 8F, CF) ppm.

<sup>11</sup>B NMR (96 MHz, *o*-C<sub>6</sub>D<sub>4</sub>Cl<sub>2</sub>):  $\delta$  = -16.2 (s) ppm.

### Synthesis of [Et<sub>3</sub>Ge-PPh<sub>3</sub>][B(C<sub>6</sub>F<sub>5</sub>)<sub>4</sub>] (**4b**)

PPh<sub>3</sub> (8.5 mg, 32  $\mu$ mol) was added to a solution of *in situ* synthesized [Et<sub>3</sub>Ge][B(C<sub>6</sub>F<sub>5</sub>)<sub>4</sub>] (32  $\mu$ mol of [Ph<sub>3</sub>C][B(C<sub>6</sub>F<sub>5</sub>)<sub>4</sub>]) in *o*-C<sub>6</sub>D<sub>4</sub>Cl<sub>2</sub> (0.4 mL) and the reaction mixture was stirred for 5 min at room temperature. The quantitative conversion of the phosphine according to the <sup>1</sup>H and <sup>31</sup>P{<sup>1</sup>H} NMR spectra yielded compound **4b**.

<sup>31</sup>P{<sup>1</sup>H} NMR (121 MHz, *o*-C<sub>6</sub>D<sub>4</sub>Cl<sub>2</sub>):  $\delta$  = 2.33 (s br, PPh<sub>3</sub>) ppm.

<sup>1</sup>H NMR (300 MHz, *o*-C<sub>6</sub>D<sub>4</sub>Cl<sub>2</sub>):  $\delta$  = 7.66 (pseudo q, *J*<sub>H,H</sub> = 7.6 Hz, 3H, *p*-(C<sub>6</sub>H<sub>5</sub>)<sub>3</sub>P); 7.59 (tdm, *J*<sub>H,H</sub> = 7.6, <sup>4</sup>*J*<sub>H,P</sub> = 2.3 Hz, 6H, *m*-(C<sub>6</sub>H<sub>5</sub>)<sub>3</sub>P); 7.53 (dm, <sup>3</sup>*J*<sub>H,P</sub> = 11.8 Hz, 3H, *o*-(C<sub>6</sub>H<sub>5</sub>)<sub>3</sub>P); 7.48 (dm, <sup>3</sup>*J*<sub>H,P</sub> = 11.7 Hz, 3H, *o*-(C<sub>6</sub>H<sub>5</sub>)<sub>3</sub>P); 1.39-1.25 (m, 6H, CH<sub>2</sub>CH<sub>3</sub>); 1.22-1.10 (m, 9H, CH<sub>2</sub>CH<sub>3</sub>) ppm.

<sup>13</sup>C{<sup>1</sup>H} NMR (75 MHz, *o*-C<sub>6</sub>D<sub>4</sub>Cl<sub>2</sub>):  $\delta$  = 149.0 (dm, <sup>1</sup>J<sub>C,F</sub> = 240 Hz, CF); 138.8 (dm, <sup>1</sup>J<sub>C,F</sub> = 244 Hz, CF); 136.9 (dm, <sup>1</sup>J<sub>C,F</sub> = 245 Hz, CF); 133.5 (d, <sup>2</sup>J<sub>C,P</sub> = 13 Hz, *o*-(C<sub>6</sub>H<sub>5</sub>)<sub>3</sub>P); 128.4 and 128.1 (s br, (C<sub>6</sub>H<sub>5</sub>)<sub>3</sub>P); 8.7 (s, CH<sub>3</sub>); 8.4 (br s, CH<sub>2</sub>) ppm. The signals for the C<sub>ipso</sub> of the anion and the phosphine ligand could not be observed due to overlapping with the solvent signals.

<sup>19</sup>F NMR (280 MHz, *o*-C<sub>6</sub>D<sub>4</sub>Cl<sub>2</sub>):  $\delta$  = -131.7 (m, 8F, CF); -162.4 (t, <sup>3</sup>J<sub>F,F</sub> = 21 Hz, 4F, *p*-CF); -166.2 (m, 8F, CF) ppm.

<sup>11</sup>B NMR (96 MHz, *o*-C<sub>6</sub>D<sub>4</sub>Cl<sub>2</sub>):  $\delta$  = -16.2 (s) ppm.

**MS** (LIFDI, *o*-C<sub>6</sub>H<sub>4</sub>Cl<sub>2</sub>): *m/z* = 423 [Et<sub>3</sub>Ge-PPh<sub>3</sub>]<sup>+</sup>

### Reaction of **1a** with Et<sub>3</sub>GeF: Formation of **5a**

[Ph<sub>3</sub>C][B(C<sub>6</sub>F<sub>5</sub>)<sub>4</sub>] (35.0 mg, 38 μmol) and Et<sub>3</sub>GeH (6.2 μL, 38 μmol) were dissolved in C<sub>6</sub>D<sub>6</sub> (0.4 mL) and the solution was stirred for 5 min at room temperature. The colourless top phase was removed and the yellow bottom phase was washed with C<sub>6</sub>D<sub>6</sub> (3 x 0.3 mL). An equivalent of Et<sub>3</sub>GeF (5.9 μL, 38 μmol) was added to the germylium ion **1a** in C<sub>6</sub>D<sub>6</sub>. For characterisation, the isolated light yellow bottom phase was dissolved in *o*-C<sub>6</sub>D<sub>4</sub>Cl<sub>2</sub> (0.3 mL). The quantitative conversion of **1a** and the fluorogermane based on the <sup>1</sup>H NMR and <sup>19</sup>F{<sup>1</sup>H} spectra yielded [Et<sub>3</sub>Ge-F-GeEt<sub>3</sub>][B(C<sub>6</sub>F<sub>5</sub>)<sub>4</sub>] (**5a**).

**<sup>1</sup>H NMR** (300 MHz, *o*-C<sub>6</sub>D<sub>4</sub>Cl<sub>2</sub>): δ = 1.37-1.04 (m, CH<sub>2</sub>CH<sub>3</sub>) ppm.

**<sup>13</sup>C{<sup>1</sup>H} NMR** (75 MHz, *o*-C<sub>6</sub>D<sub>4</sub>Cl<sub>2</sub>): δ = 148.9 (dm, <sup>1</sup>J<sub>C,F</sub> = 243 Hz, CF); 138.8 (dm, <sup>1</sup>J<sub>C,F</sub> = 245 Hz, CF); 136.8 (dm, <sup>1</sup>J<sub>C,F</sub> = 245 Hz, CF); 9.4 (s br, CH<sub>2</sub>); 7.1 (s, CH<sub>3</sub>) ppm. The signal of the C<sub>ipso</sub> of the anion could not be observed due to overlapping with the solvent signals.

**<sup>19</sup>F NMR** (280 MHz, *o*-C<sub>6</sub>D<sub>4</sub>Cl<sub>2</sub>): δ = -131.7 (m, 8F, CF); -162.3 (t, <sup>3</sup>J<sub>F,F</sub> = 20.7 Hz, 4F, *p*-CF); -166.2 (m, 8F, CF); -196.9 (s br, 1F, Ge-F-Ge) ppm.

**<sup>11</sup>B NMR** (96 MHz, *o*-C<sub>6</sub>D<sub>4</sub>Cl<sub>2</sub>): δ = -16.2 (s) ppm.

### Reaction of **1b** with Ph<sub>3</sub>GeF: Formation of **5b**

[Ph<sub>3</sub>C][B(C<sub>6</sub>F<sub>5</sub>)<sub>4</sub>] (30.0 mg, 32 μmol) and Ph<sub>3</sub>GeH (9.91 mg, 32 μmol) were dissolved in C<sub>6</sub>D<sub>6</sub> (0.4 mL) and reaction mixture was stirred for 5 min at room temperature. The colourless top phase was removed and the yellow bottom phase was washed with C<sub>6</sub>D<sub>6</sub> (3 x 0.3 mL). Then, Ph<sub>3</sub>GeF (10.5 mg, 32 μmol) in C<sub>6</sub>D<sub>6</sub> (0.3 mL) was added to germylium ion **1b**. For characterisation, the isolated light yellow bottom phase was dissolved in *o*-C<sub>6</sub>D<sub>4</sub>Cl<sub>2</sub> (0.3 mL). The quantitative conversion of **1b** and the fluorogermane based on the <sup>1</sup>H NMR and <sup>19</sup>F{<sup>1</sup>H} spectra yielded [Ph<sub>3</sub>Ge-F-GePh<sub>3</sub>][B(C<sub>6</sub>F<sub>5</sub>)<sub>4</sub>] (**5b**).

**<sup>1</sup>H NMR** (300 MHz, *o*-C<sub>6</sub>D<sub>4</sub>Cl<sub>2</sub>): δ = 7.8-7.34 (m, H<sub>ar</sub>) ppm.

**<sup>13</sup>C{<sup>1</sup>H} NMR** (125 MHz, *o*-C<sub>6</sub>D<sub>4</sub>Cl<sub>2</sub>): δ = 149.1 (dm, <sup>1</sup>J<sub>C,F</sub> = 242 Hz, CF); 138.9 (dm, <sup>1</sup>J<sub>C,F</sub> = 244 Hz, CF); 136.7 (dm, <sup>1</sup>J<sub>C,F</sub> = 248 Hz, CF); 134.7 (s, C<sub>ar</sub>); 129.6 (s, C<sub>ar</sub>); 128.6 (s, C<sub>ar</sub>) ppm. Both signals for C<sub>ipso</sub> could not be observed due to overlapping with the solvent's signals.

**<sup>19</sup>F NMR** (280 MHz, *o*-C<sub>6</sub>D<sub>4</sub>Cl<sub>2</sub>): δ = -131.6 (m, 8F, CF); -162.4 (t, <sup>3</sup>J<sub>F,F</sub> = 21 Hz, 4F, *p*-CF); -166.1 (m, 8F, CF); -170.4 (s br, 1F, Ge-F-Ge) ppm.

**<sup>11</sup>B NMR** (96 MHz, *o*-C<sub>6</sub>D<sub>4</sub>Cl<sub>2</sub>): δ = -16.1 (s) ppm.

## 3. Stoichiometric C–F Bond Activation Reactions.

### Formation of **5** and 1,2-dichloro-4-cyclohexylbenzene-d<sub>3</sub>

In a JYoung NMR tube, [R<sub>3</sub>Ge][B(C<sub>6</sub>F<sub>5</sub>)<sub>4</sub>] (R = Et (**1a**), <sup>*n*</sup>Bu (**1c**)) (32 μmol) or [R<sub>3</sub>Ge-H-GeR<sub>3</sub>][B(C<sub>6</sub>F<sub>5</sub>)<sub>4</sub>] (R = Et (**3a**), <sup>*n*</sup>Bu (**3c**)) (32 μmol) was dissolved in *o*-C<sub>6</sub>D<sub>4</sub>Cl<sub>2</sub> (0.4 mL). Then fluorocyclohexane (3.6 μL, 32 μmol) was added. After 5 minutes, full conversion of the fluorocyclohexane and formation of 1,2-dichloro-4-cyclohexylbenzene-d<sub>3</sub> together with the formation of species such as [R<sub>3</sub>Ge-F-GeR<sub>3</sub>][B(C<sub>6</sub>F<sub>5</sub>)<sub>4</sub>] (R = Et (**5a**), <sup>*n*</sup>Bu (**5c**)) were observed. The Friedel Craft product was identify based on the non-deuterated derivative described in the literature.<sup>[1]</sup>

NMR data for R = *n*Bu (**5c**):

<sup>1</sup>H NMR (300 MHz, *o*-C<sub>6</sub>D<sub>4</sub>Cl<sub>2</sub>): δ = 1.70-1.43 (m, 36H, CH<sub>2</sub>CH<sub>2</sub>CH<sub>2</sub>CH<sub>3</sub>); 1.14-1.04 (m, 18H, CH<sub>3</sub>) ppm.

<sup>13</sup>C{<sup>1</sup>H} NMR (75 MHz, *o*-C<sub>6</sub>D<sub>4</sub>Cl<sub>2</sub>): δ = 148.9 (dm, <sup>1</sup>J<sub>C,F</sub> = 243 Hz, CF); 138.8 (dm, <sup>1</sup>J<sub>C,F</sub> = 244 Hz, CF); 136.9 (dm, <sup>1</sup>J<sub>C,F</sub> = 244 Hz, CF); 26.1, 25.6 and 18.7 (all s, CH<sub>2</sub>); 13.6 (s, CH<sub>3</sub>) ppm. The signal of the C<sub>ipso</sub> of the anion could not be observed due to overlapping with the solvent's signals.

<sup>19</sup>F NMR (280 MHz, *o*-C<sub>6</sub>D<sub>4</sub>Cl<sub>2</sub>): δ = -131.7 (m, 8F, CF); -162.4 (t, <sup>3</sup>J<sub>F,F</sub> = 20.7 Hz, 4F, *p*-CF); -166.2 (m, 8F, CF); -201.6 (s br, Ge-F-Ge) ppm.

<sup>11</sup>B NMR (96 MHz, *o*-C<sub>6</sub>D<sub>4</sub>Cl<sub>2</sub>): δ = -16.2 (s) ppm.

## 4. General Procedures for Catalytic C–F Bond Activation Reactions

### Activation of fluorocyclohexane

In a JYoung NMR tube, [Ph<sub>3</sub>C][B(C<sub>6</sub>F<sub>5</sub>)<sub>4</sub>] (9.2 mg, 0.01 mmol) was dissolved in *o*-C<sub>6</sub>D<sub>4</sub>Cl<sub>2</sub> (0.4 mL). Then, R<sub>3</sub>GeH (R = Et, <sup>*n*</sup>Bu) (0.2 or 0.4 mmol) and fluorocyclohexane (0.1 or 0.2 mmol) were added. H<sub>2</sub> evolution was observed. The reactions were performed either at room temperature or under heating (Table S1). The reaction progress was monitored by <sup>1</sup>H and <sup>19</sup>F NMR spectroscopy. For the reaction without solvent, same procedure was used and after the reaction time C<sub>6</sub>D<sub>6</sub> was added in order to measure the NMR. The products were identified by their characteristic signals in the <sup>1</sup>H or <sup>19</sup>F NMR spectra (Tables S3 and S4).

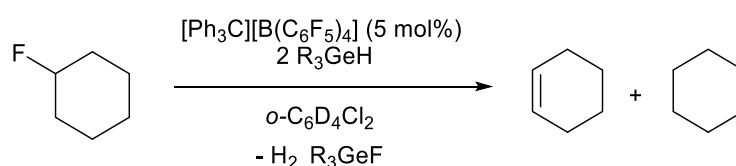

**Table S1.** C-F activation of fluorocyclohexane by germylium ions.

| R               | T (°C) | Time   | Conversion (%) <sup>a</sup> | Products ratio |
|-----------------|--------|--------|-----------------------------|----------------|
| Et              | rt     | 30 min | 100                         | 7:1            |
| Et <sup>b</sup> | rt     | 5 h    | 99                          | 12:1           |
| Et <sup>c</sup> | 100    | 1 d    | 100                         | 10:1           |
| Et <sup>d</sup> | rt     | 30 min | 100                         | 5:1            |
| <i>n</i> Bu     | rt     | 4 d    | 23                          | 1:0            |
| <i>n</i> Bu     | 65     | 2 h    | 100                         | 3:1            |

a) Based on consumption of fluorocyclohexane by integration of the <sup>19</sup>F NMR spectra. b) 2.5 mol% of catalyst.

c) Compound **4b** as catalytic precursor. d) Reaction in neat conditions

### Activation of other fluorinated substrates

In a JYoung NMR tube, [Ph<sub>3</sub>C][B(C<sub>6</sub>F<sub>5</sub>)<sub>4</sub>] (9.2 mg, 0.01 mmol) was dissolved in *o*-C<sub>6</sub>D<sub>4</sub>Cl<sub>2</sub> (0.4 mL). Then, Et<sub>3</sub>GeH (0.2 or 0.4 mmol) and the fluorinated substrate (0.1 or 0.2 mmol) were added. H<sub>2</sub> evolution was observed. The Reactions took place at room temperature or at 65°C (Table S2). The reaction

progress was monitored by  $^1\text{H}$  and  $^{19}\text{F}$  NMR spectroscopy. The products were identified by characteristic signals in the  $^1\text{H}$  or  $^{19}\text{F}$  NMR spectra (Tables S3 and S4).

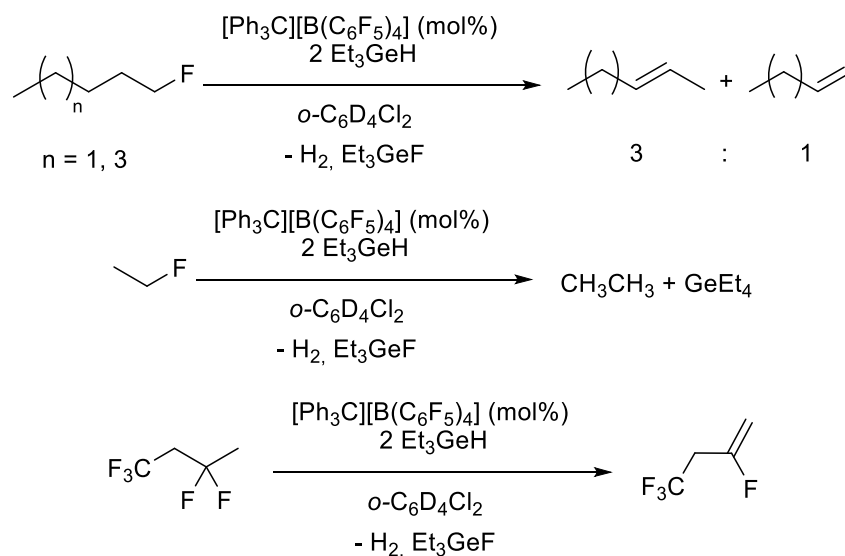

**Table S2.** Dehydrofluorination reaction by germylium ions

| Substrate                                                                           | Mol%            | T (°C) | Time             | Conversion (%) <sup>a</sup> |
|-------------------------------------------------------------------------------------|-----------------|--------|------------------|-----------------------------|
|   | 5               | rt     | 1 d <sup>b</sup> | 62                          |
|                                                                                     | 10              | rt     | 1 d <sup>c</sup> | 73                          |
|                                                                                     | 5               | 65     | 6 h 30 min       | 99                          |
|                                                                                     | 10              | 65     | 3 h              | 100                         |
|                                                                                     | 10 <sup>d</sup> | 65     | 4 h              | 99                          |
|  | 10              | 65     | 5 h              | 100                         |
|  | 10              | 65     | 1 w              | 99                          |
|  | 10              | 65     | 3d               | 5                           |

a) Based on consumption of fluorocyclohexane by integration of the  $^{19}\text{F}$  NMR spectra. b) 3d, 66% conversion. c) 3d, 77% conversion. d)  $n\text{Bu}_3\text{GeH}$  used as hydrogen source.



**Table S3** Selected NMR resonances of substrates in *ortho*-dichlorobenzene

| Substrate                   | $\delta$ ( $^1\text{H}$ NMR) [ppm]                                                                                                                                                                                                                                                    | $\delta$ ( $^{19}\text{F}$ NMR) [ppm]                                                                               |
|-----------------------------|---------------------------------------------------------------------------------------------------------------------------------------------------------------------------------------------------------------------------------------------------------------------------------------|---------------------------------------------------------------------------------------------------------------------|
| $\text{Et}_3\text{GeH}$     | 3.96 (hept, $^3J_{\text{H,H}} = 2.8$ Hz, 1H, HGe); 1.26 (t, $^3J_{\text{H,H}} = 7.9$ Hz, 9H, $\text{CH}_3$ ); 0.99 (qd, $^3J_{\text{H,H}} = 7.9$ , $^3J_{\text{H,H}} = 2.8$ Hz, 6H, $\text{CH}_2$ )                                                                                   | -                                                                                                                   |
| $\text{Et}_3\text{GeF}$     | 1.29-1.24 (m, 9H, $\text{CH}_3$ ); 1.23-1.15 (m, 6H, $\text{CH}_2$ )                                                                                                                                                                                                                  | -211.5 (hept br, $^3J_{\text{F,H}} = 5$ Hz)                                                                         |
| $n\text{Bu}_3\text{GeH}$    | 4.04 (hept, $^3J_{\text{H,H}} = 3.0$ Hz, 1H, HGe); 1.69-1.47 (m, 12H, $\text{Ge}(\text{CH}_2)_2$ ); 1.11 (t, $^3J_{\text{H,H}} = 7.1$ Hz, 9H, $\text{CH}_3$ ); 1.07-0.99 (m, 6H, $\text{CH}_2\text{CH}_3$ )                                                                           | -                                                                                                                   |
| $\text{Ph}_3\text{GeH}$     | 7.77-7.68 (m, 6H, $\text{H}_{\text{ar}}$ ); 7.57-7.46 (m, 9H, $\text{H}_{\text{ar}}$ ); 5.94 (s, 1H, HGe)                                                                                                                                                                             | -                                                                                                                   |
| $\text{Ph}_3\text{GeF}$     | 7.89-7.81 (m, 6H, $\text{H}_{\text{ar}}$ ); 7.64-7.52 (m, 9H, $\text{H}_{\text{ar}}$ )                                                                                                                                                                                                | -200.9 (s)                                                                                                          |
| Fluoropentane               | 4.51 (dt, $^2J_{\text{H,F}} = 47.6$ , $^3J_{\text{H,H}} = 6.2$ Hz, 2H, $\text{CH}_2\text{F}$ ); 1.76 (dm, $^3J_{\text{H,F}} = 24.4$ Hz, 2H, $\text{CH}_2\text{CH}_2\text{F}$ ); 1.51-1.37 (m, 2H, $\text{CH}_2\text{CH}_3$ ); 1.06-1.00 (m, 3H, $\text{CH}_2\text{CH}_3$ )            | -216.7 (hept, $^2J_{\text{F,H}} = 24$ Hz)                                                                           |
| Fluorocyclohexane           | 4.66 (dt, $^2J_{\text{H,F}} = 48.9$ , $^3J_{\text{H,H}} = 7.8$ , $^3J_{\text{H,H}} = 3.9$ Hz, 1H, CHF); 2.02-1.88 (m, 2H, $\text{CH}_2$ ); 1.88-1.79 (m, 2H, $\text{CH}_2$ ); 1.79-1.66 (m, 2H, $\text{CH}_2$ ); 1.60-1.48 (m, 2H, $\text{CH}_2$ ); 1.48-1.34 (m, 2H, $\text{CH}_2$ ) | -172.2 (s br)                                                                                                       |
| Fluoroethane                | 4.57 (dq, $^2J_{\text{H,F}} = 47.0$ , $^3J_{\text{H,H}} = 7.0$ Hz, 2H, $\text{CH}_2\text{F}$ ); 1.42 (dt, $^2J_{\text{H,F}} = 26.0$ , $^3J_{\text{H,H}} = 7.0$ Hz, 3H, $\text{CH}_3$ )                                                                                                | -209.9 (tq, $^2J_{\text{F,H}} = 70$ , $^2J_{\text{F,H}} = 26$ Hz)                                                   |
| 1,1,1,3,3-Pentafluorobutane | 2.76 (tq, $^3J_{\text{H,F}} = 13.6$ , $^3J_{\text{H,F}} = 10.3$ Hz, 2H, $\text{CH}_2$ ); 1.78 (t, $^3J_{\text{H,F}} = 18.7$ , 3H, $\text{CH}_3$ )                                                                                                                                     | -61.8 (pseudo pent, $^3J_{\text{F,H}} \approx ^4J_{\text{F,F}} = 10$ Hz, $\text{CF}_3$ ); -86.8 (m, $\text{CF}_2$ ) |

**Table S4** Selected NMR resonances of products in *ortho*-dichlorobenzene

| Product                      | $\delta$ ( $^1\text{H}$ NMR) [ppm]                                                                                                                                                  | $\delta$ ( $^{19}\text{F}$ NMR) [ppm]                                                                                                                                           |
|------------------------------|-------------------------------------------------------------------------------------------------------------------------------------------------------------------------------------|---------------------------------------------------------------------------------------------------------------------------------------------------------------------------------|
| <i>Z</i> -2-pentene          | 5.60-5.50 (m, 2H, CH=CH); 1.75 (dm, $^3J_{\text{H,H}} = 5.2$ Hz, $\text{H}_3\text{C}-\text{C}=\text{C}$ )                                                                           |                                                                                                                                                                                 |
| <i>E</i> -2-pentene          | 5.66-5.48 (m, 2H, CH=CH); 1.80 (dm, $^3J_{\text{H,H}} = 5.9$ Hz, $\text{H}_3\text{C}-\text{C}=\text{C}$ )                                                                           |                                                                                                                                                                                 |
| cyclohexene                  | 5.86-5.68 (m, 2H, CH=CH); 2.20-2.06 (m, 2H, $\text{CH}_2$ )                                                                                                                         |                                                                                                                                                                                 |
| cyclohexane                  | 1.59 (s, $\text{CH}_2$ )                                                                                                                                                            |                                                                                                                                                                                 |
| $\text{H}_2$                 | 4.75 (s)                                                                                                                                                                            | -                                                                                                                                                                               |
| <i>n</i> Bu <sub>3</sub> GeF | n.d.                                                                                                                                                                                | -205.2 (m)                                                                                                                                                                      |
| <i>Z</i> -2-heptene          | 5.74-5.46 (m, 2H, CH=CH); 1.78 (dm, $^3J_{\text{H,H}} = 4.5$ Hz, $\text{H}_3\text{C}-\text{C}=\text{C}$ )                                                                           |                                                                                                                                                                                 |
| <i>E</i> -2-heptene          | 5.74-5.46 (m, 2H, CH=CH); 1.82 (dm, $^3J_{\text{H,H}} = 4.8$ Hz, $\text{H}_3\text{C}-\text{C}=\text{C}$ )                                                                           |                                                                                                                                                                                 |
| Ethane                       | 1.36 (s)                                                                                                                                                                            |                                                                                                                                                                                 |
| 2,4,4,4-tetrafluoro-1-butene | 4.94 (dd, $^3J_{\text{H,F}} = 16.0$ , $^3J_{\text{H,H}} = 3.6$ Hz, 1H, $=\text{CH}_2$ );<br>4.62 (dd, $^3J_{\text{H,F}} = 47.2$ , $^3J_{\text{H,H}} = 3.6$ Hz, 1H, $=\text{CH}_2$ ) | -64.8 (td, $^3J_{\text{F,H}} = 10$ , $^4J_{\text{F,F}} = 7$ Hz, $\text{CF}_3$ ); -94.5 (dtq, $^3J_{\text{F,H}} = 47$ , $^3J_{\text{F,H}} = 16$ , $^4J_{\text{F,F}} = 7$ Hz, CF) |

## 5. X-Ray Diffraction Analysis

For the structure determination, the data collection was performed with a BRUKER D8 VENTURE area detector using Mo- $\text{K}_\alpha$  radiation ( $\lambda = 0.71073$  Å). Multiscan absorption corrections implemented in SADABS<sup>[2]</sup> were applied to the data. The structures were solved by intrinsic phasing method (SHELXT-2013)<sup>[3]</sup> and refined by full-matrix least square procedures based on F2 with all measured reflections (SHELXL-2013), with anisotropic temperature factors for all non-hydrogen atoms. All carbon bound hydrogen atoms were added geometrically and refined by using a riding model. Crystallographic data (excluding structure factors) for the structures in this paper have been deposited with the Cambridge Crystallographic Data Centre, CCDC 1983059.

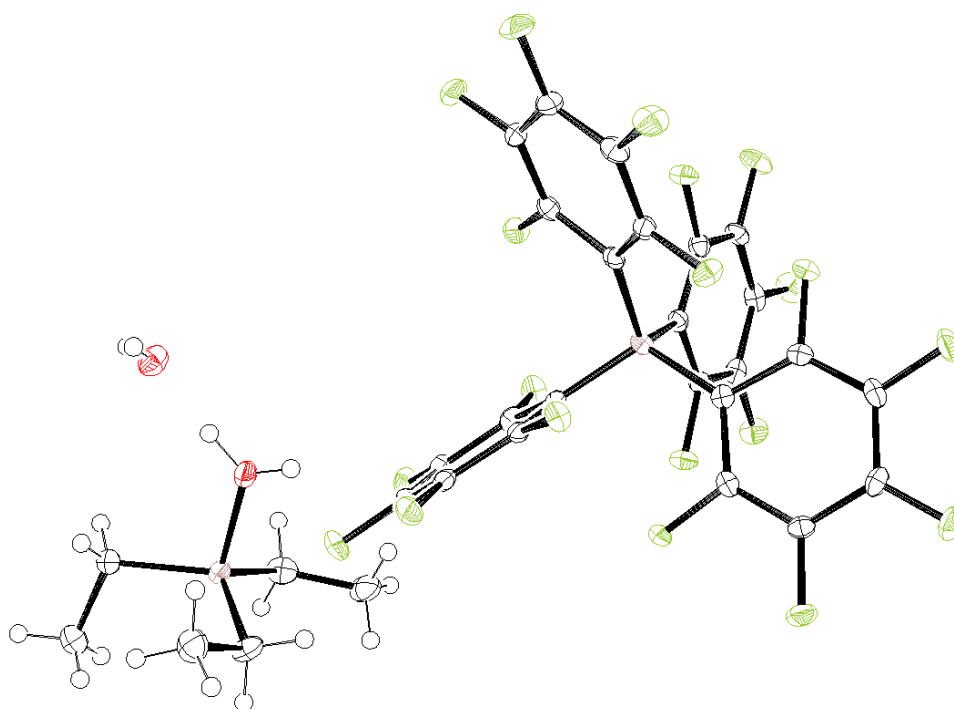

**Figure S1.** ORTEP representation of  $[\text{Et}_3\text{Ge-OH}_2][\text{B}(\text{C}_6\text{F}_5)_4] \cdot \text{H}_2\text{O}$  (**3·H<sub>2</sub>O**).

**Table 3.** Cristal data and structure refinement for compound **3·H<sub>2</sub>O**.

|                        |                                                                                               |                                         |                                                                       |
|------------------------|-----------------------------------------------------------------------------------------------|-----------------------------------------|-----------------------------------------------------------------------|
| Empirical formula      | $\text{C}_{30}\text{H}_{19}\text{BF}_{20}\text{GeO}_2$                                        | Crystal size                            | $0.60 \times 0.355 \times 0.24 \text{ mm}^3$                          |
| Formula weight         | 874.85                                                                                        | $\theta$ range for data collection      | $2.165^\circ$ to $25.082^\circ$ .                                     |
| Temperature            | 100(2) K                                                                                      | Index ranges                            | $-17 \leq h \leq 17$ , $-20 \leq k \leq 20$ ,<br>$-29 \leq l \leq 28$ |
| Wavelength             | $0.71073 \text{ \AA}$                                                                         | Reflections collected                   | 75256                                                                 |
| Crystal system         | Orthorhombic                                                                                  | Independent reflections                 | 5570 [ $R(\text{int}) = 0.0323$ ]                                     |
| Space group            | Pbca                                                                                          | Completeness to $\theta = 25.082^\circ$ | 99.8 %                                                                |
| Unit cell dimensions   | $a = 14.3032(13) \text{ \AA}$<br>$b = 17.5925(15) \text{ \AA}$<br>$c = 24.968(2) \text{ \AA}$ | Absorption correction                   | Semi-empirical from equivalents                                       |
| Volume                 | $6282.8(10) \text{ \AA}^3$                                                                    | Max. and min. transmission              | 0.7452 and 0.5653                                                     |
| Z                      | 8                                                                                             | Refinement method                       | Full-matrix least-squares on $F^2$                                    |
| Density (calculated)   | $1.850 \text{ mg/m}^3$                                                                        | Data/ restraints / parameters           | 5570 / 1 / 504                                                        |
| Absorption coefficient | $1.125 \text{ mm}^{-1}$                                                                       | Goodness-of-fit on $F^2$                | 1.017                                                                 |
| F(000)                 | 3456                                                                                          | Final R indices [ $ I  > 2\sigma(I)$ ]  | $R1 = 0.0276$ , $wR2 = 0.1051$                                        |
|                        |                                                                                               | R indices (all data)                    | $R1 = 0.0312$ , $wR2 = 0.1112$                                        |
|                        |                                                                                               | Largest diff. peak and hole             | 0.359 and $-0.711 \text{ e. \AA}^{-3}$                                |

## 6. Mass and NMR spectra

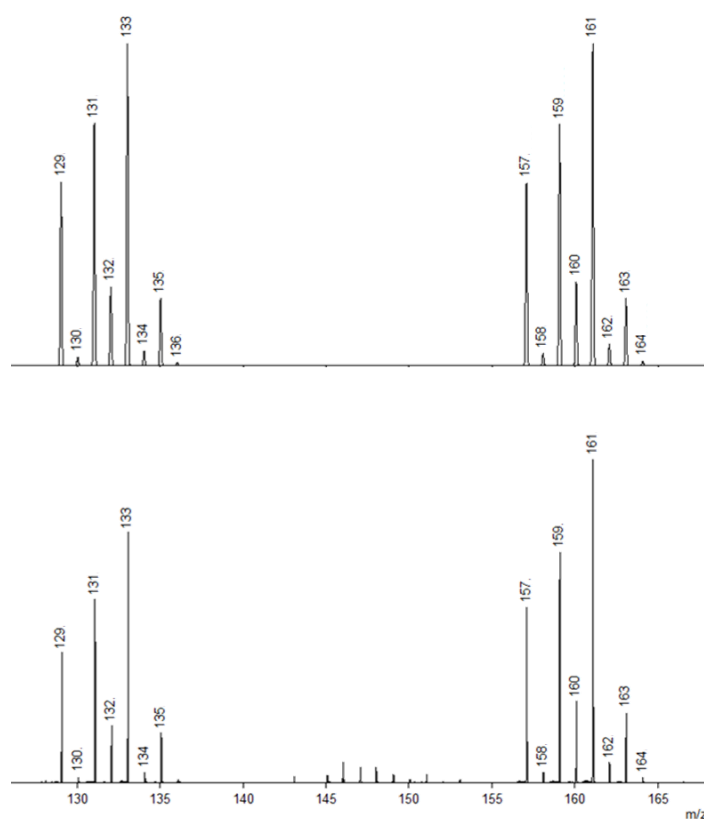

**Figure S2.** Experimental (bottom) and simulated (up) mass spectrum of  $[\text{Et}_3\text{Ge}]^+$ .

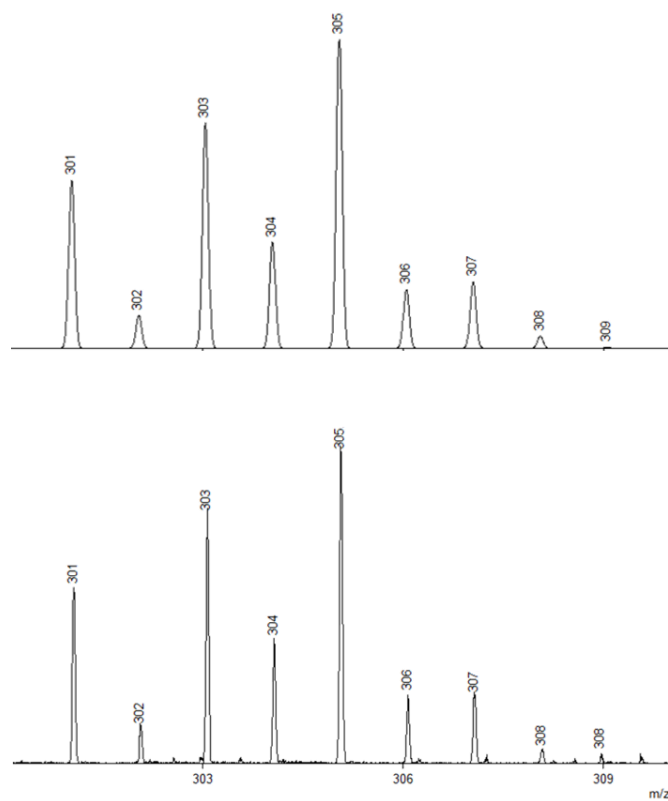

**Figure S3.** Experimental (bottom) and simulated (up) mass spectrum of  $[\text{Ph}_3\text{Ge}]^+$ .

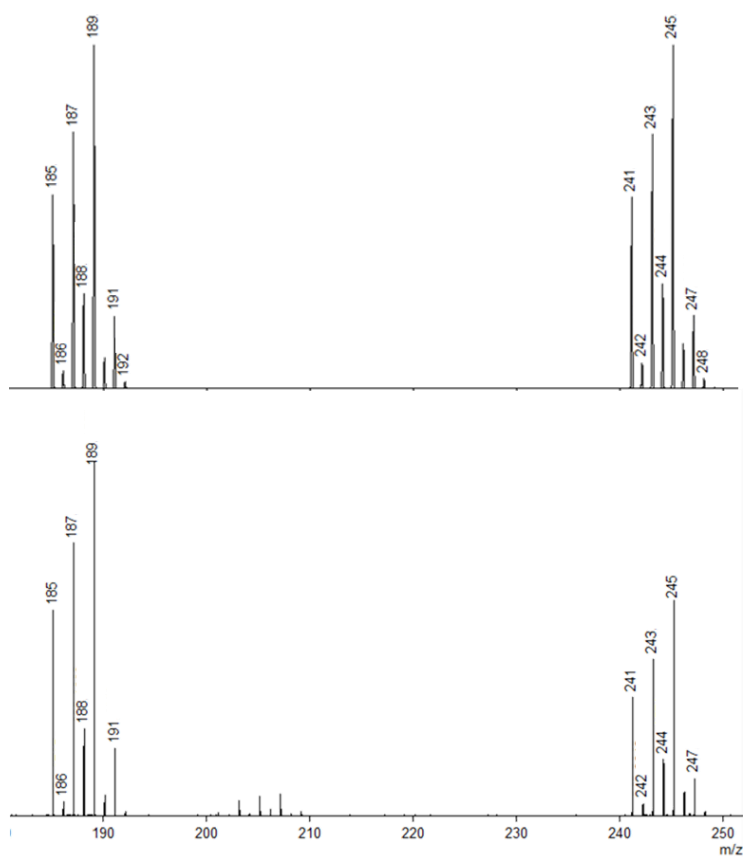

**Figure S4.** Experimental (bottom) and simulated (up) mass spectrum of  $[n\text{Bu}_3\text{Ge}]^+$ .

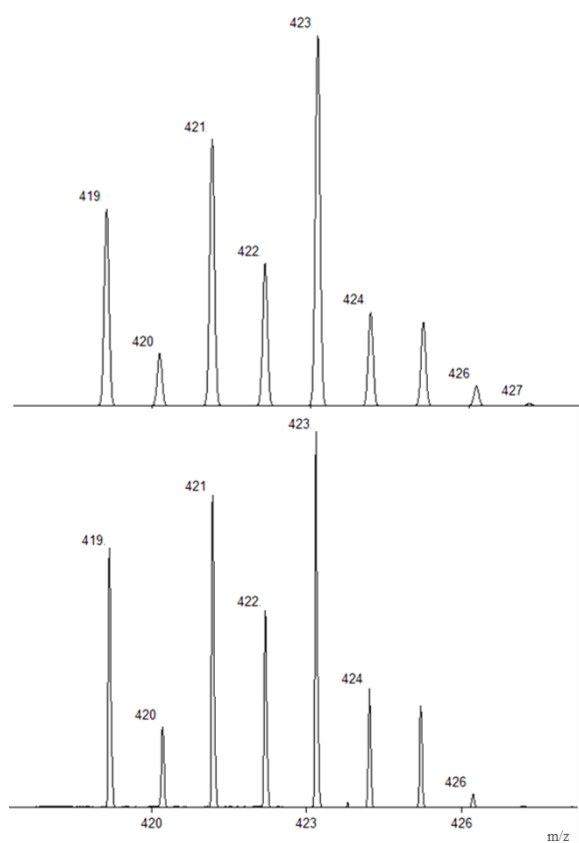

**Figure S5.** Experimental (bottom) and simulated (up) mass spectrum of  $[\text{Et}_3\text{Ge-PPh}_3]^+$ .

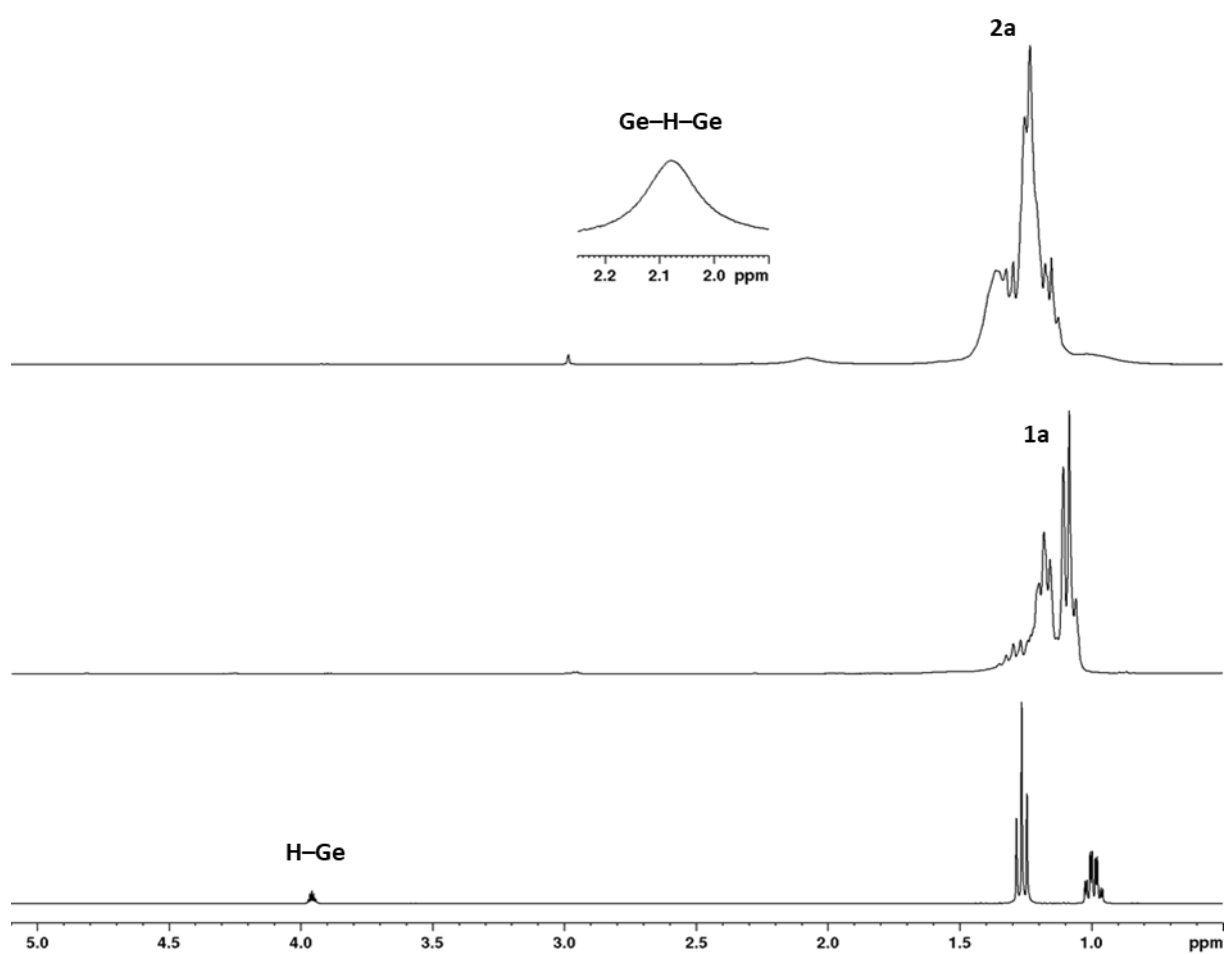

**Figure S6.** Section of the  $^1\text{H}$  NMR spectra of  $\text{Et}_3\text{GeH}$  (bottom),  $[\text{Et}_3\text{Ge}][\text{B}(\text{C}_6\text{F}_5)_4]$  (**1a**, middle) and  $[\text{Et}_3\text{GeHGeEt}_3][\text{B}(\text{C}_6\text{F}_5)_4]$  (**2a**, top) in *o*-dichlorobenzene- $\text{d}_4$ .

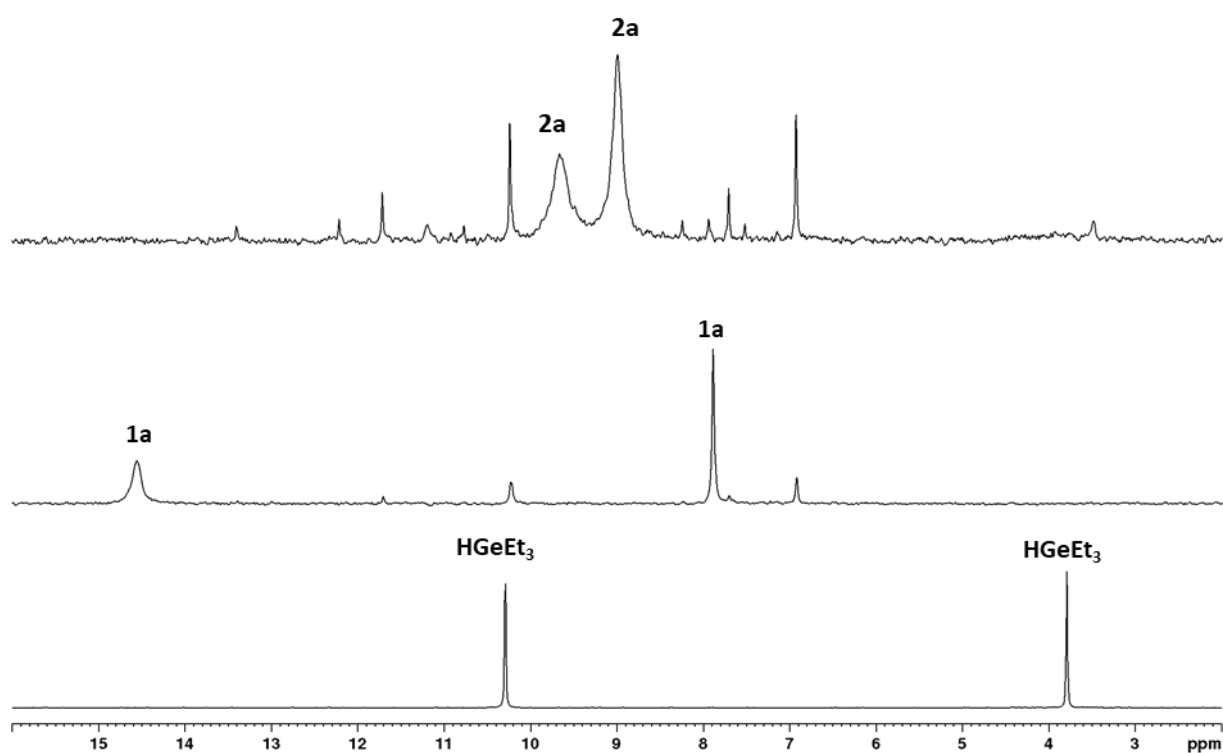

**Figure S7.** Section of the  $^{13}\text{C}\{^1\text{H}\}$  NMR spectra of  $\text{Et}_3\text{GeH}$  (bottom),  $[\text{Et}_3\text{Ge}][\text{B}(\text{C}_6\text{F}_5)_4]$  (**1a**, middle) and  $[\text{Et}_3\text{GeHGeEt}_3][\text{B}(\text{C}_6\text{F}_5)_4]$  (**2a**, top) in *o*-dichlorobenzene- $\text{d}_4$ .

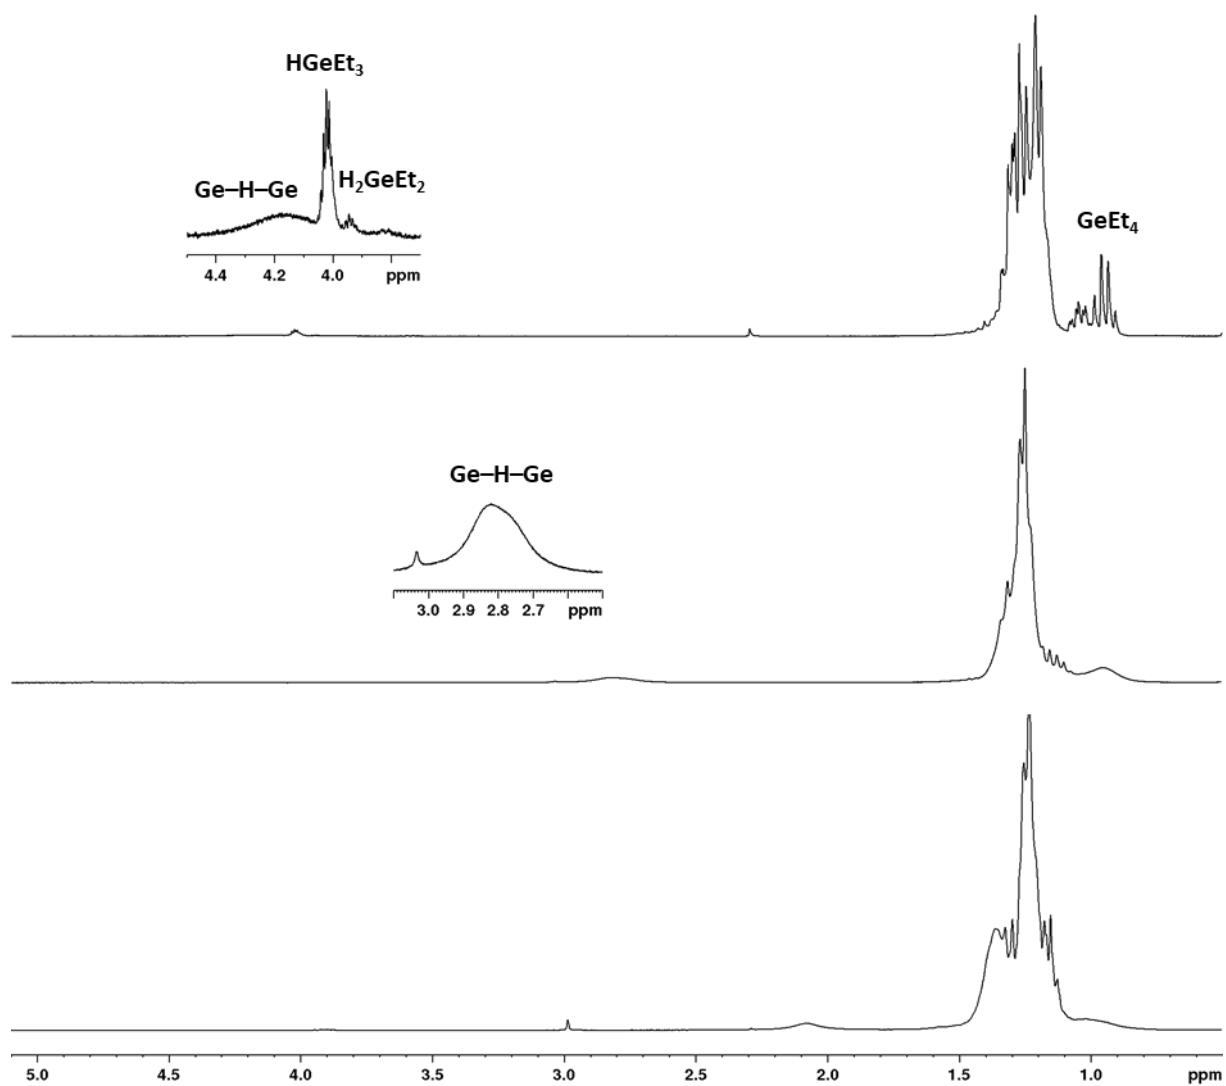

**Figure S8.** Section of the  $^1\text{H}$  NMR spectra of  $[\text{Et}_3\text{GeHGeEt}_3][\text{B}(\text{C}_6\text{F}_5)_4]$  (**2a**, bottom) and after addition of 1 equivalent (middle) or excess (top) of  $\text{HGeEt}_3$  in *o*-dichlorobenzene- $\text{d}_4$ .



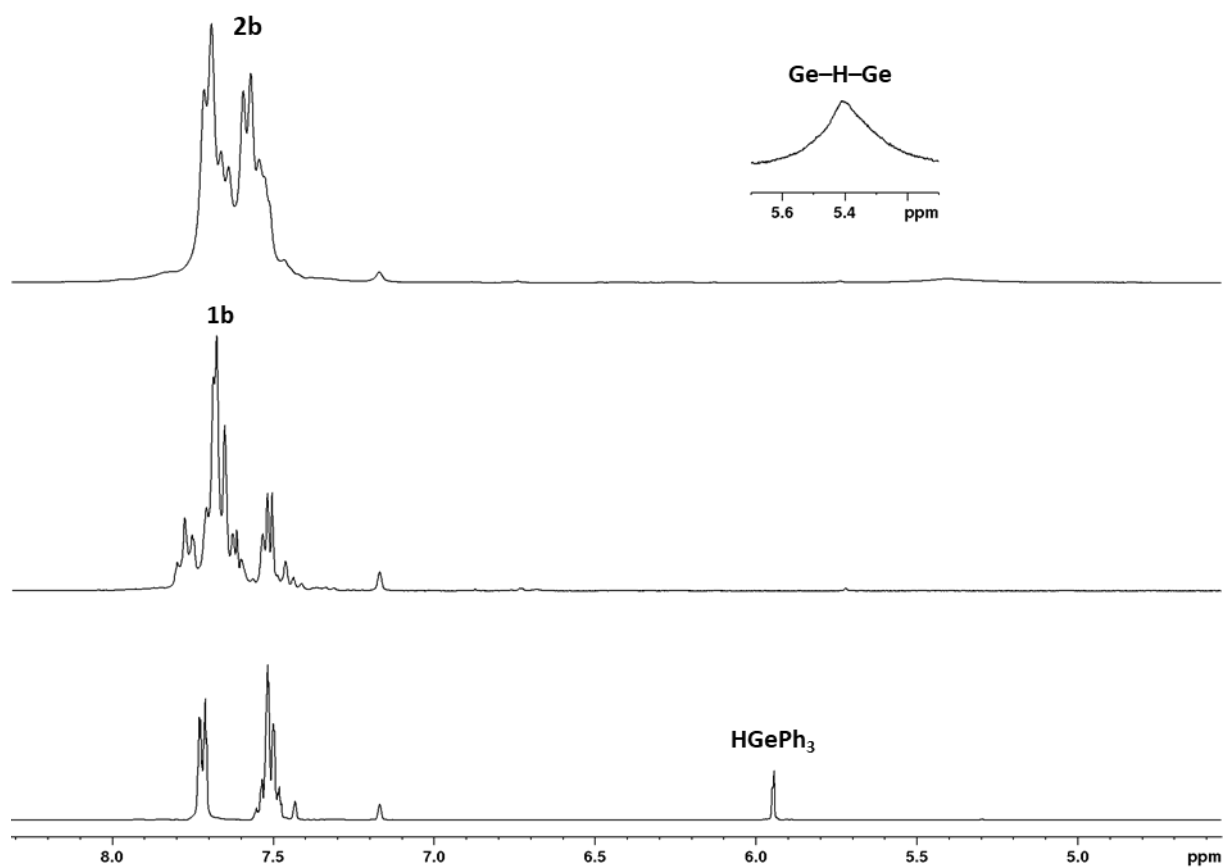

**Figure S9.** Section of the  $^1\text{H}$  NMR spectra of  $\text{Ph}_3\text{GeH}$  (bottom),  $[\text{Ph}_3\text{Ge}][\text{B}(\text{C}_6\text{F}_5)_4]$  (**1b**, middle) and  $[\text{Ph}_3\text{GeHGePh}_3][\text{B}(\text{C}_6\text{F}_5)_4]$  (**2b**, top) in *o*-dichlorobenzene- $\text{d}_4$ .

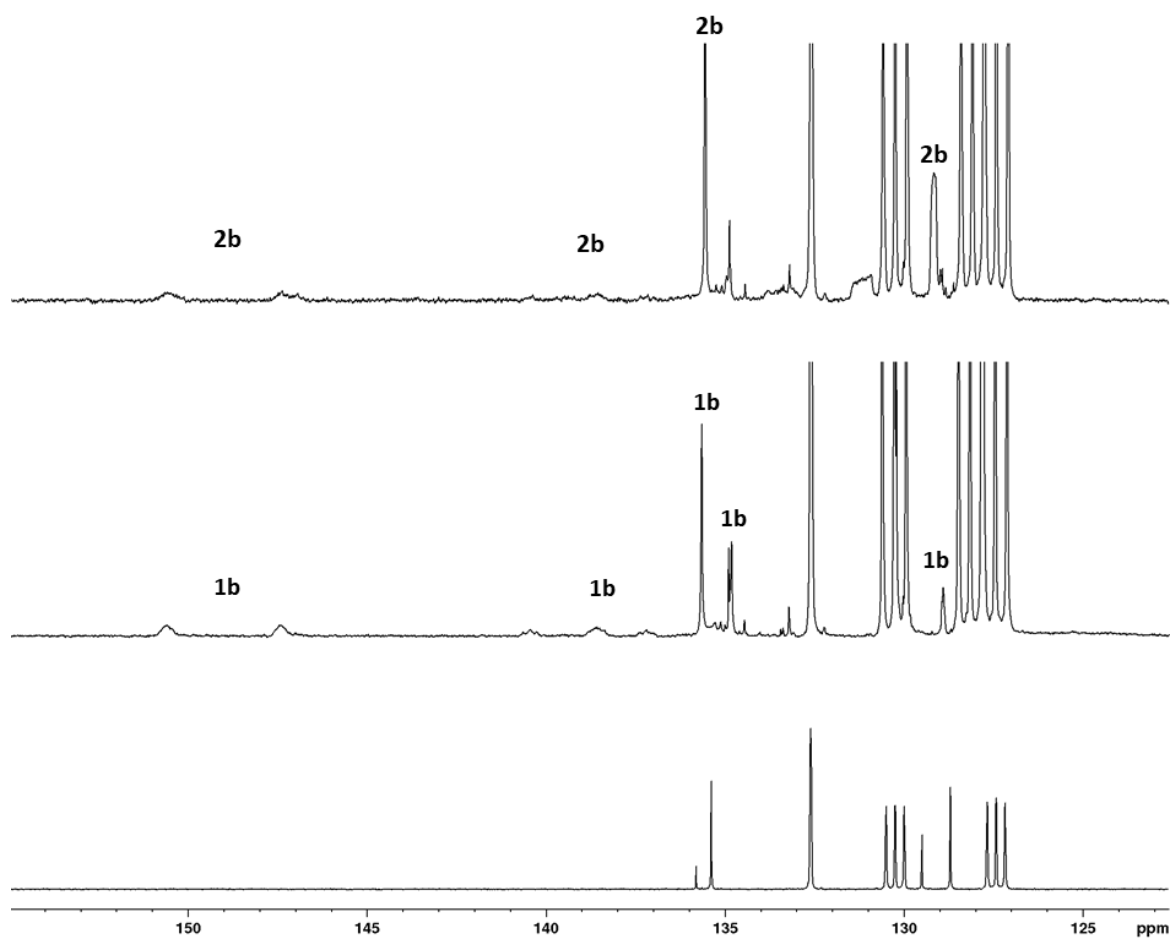

**Figure S10.**  $^{13}\text{C}\{^1\text{H}\}$  NMR spectra of  $\text{Ph}_3\text{GeH}$  (bottom),  $[\text{Ph}_3\text{Ge}][\text{B}(\text{C}_6\text{F}_5)_4]$  (**1b**, middle) and  $[\text{Ph}_3\text{GeHGePh}_3][\text{B}(\text{C}_6\text{F}_5)_4]$  (**2b**, top) in *o*-dichlorobenzene- $d_4$ . Note that  $\text{C}_6\text{D}_6$  was not completely removed.

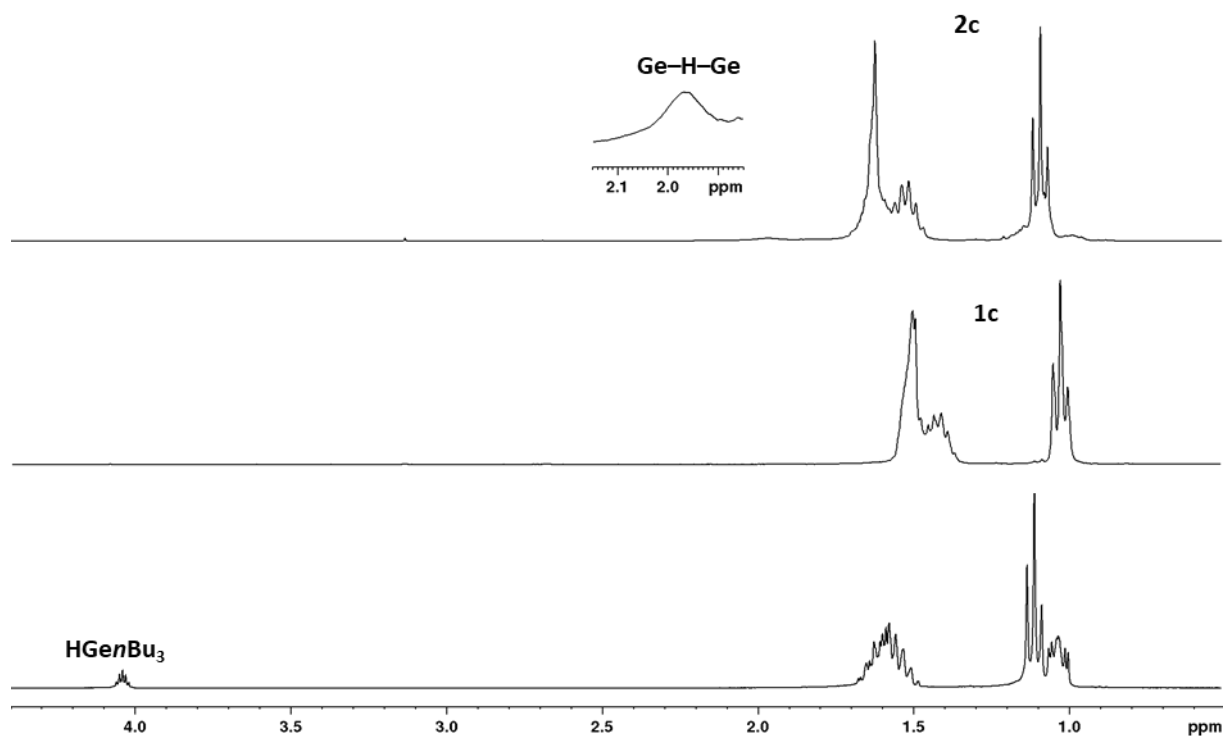

**Figure S11.** Section of the  $^1\text{H}$  NMR spectra of  $\text{nBu}_3\text{GeH}$  (bottom),  $[\text{nBu}_3\text{Ge}][\text{B}(\text{C}_6\text{F}_5)_4]$  (**1c**, middle) and  $[\text{nBu}_3\text{GeHGeHnBu}_3][\text{B}(\text{C}_6\text{F}_5)_4]$  (**2c**, top) in *o*-dichlorobenzene- $d_4$ .

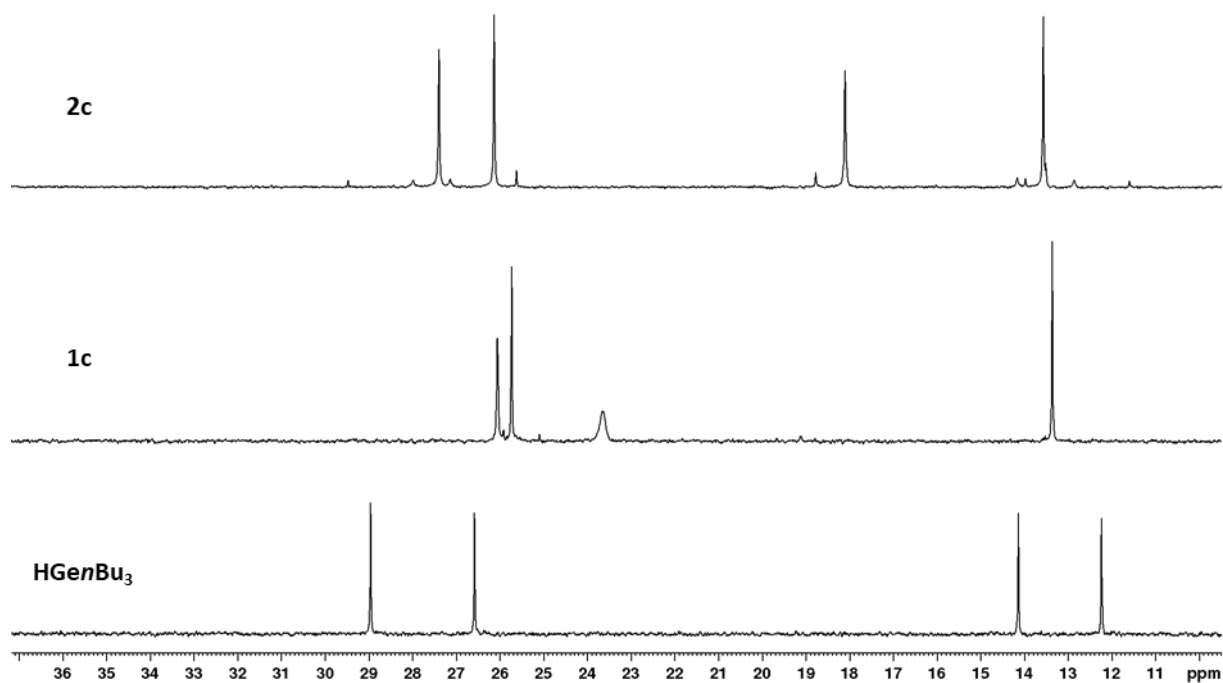

**Figure S12.** Section of the  $^{13}\text{C}\{^1\text{H}\}$  NMR spectra of  $n\text{Bu}_3\text{GeH}$  (bottom),  $[\text{nBu}_3\text{Ge}][\text{B}(\text{C}_6\text{F}_5)_4]$  (**1c**, middle) and  $[\text{nBu}_3\text{GeHGenBu}_3][\text{B}(\text{C}_6\text{F}_5)_4]$  (**2c**, top) in *o*-dichlorobenzene- $\text{d}_4$ .

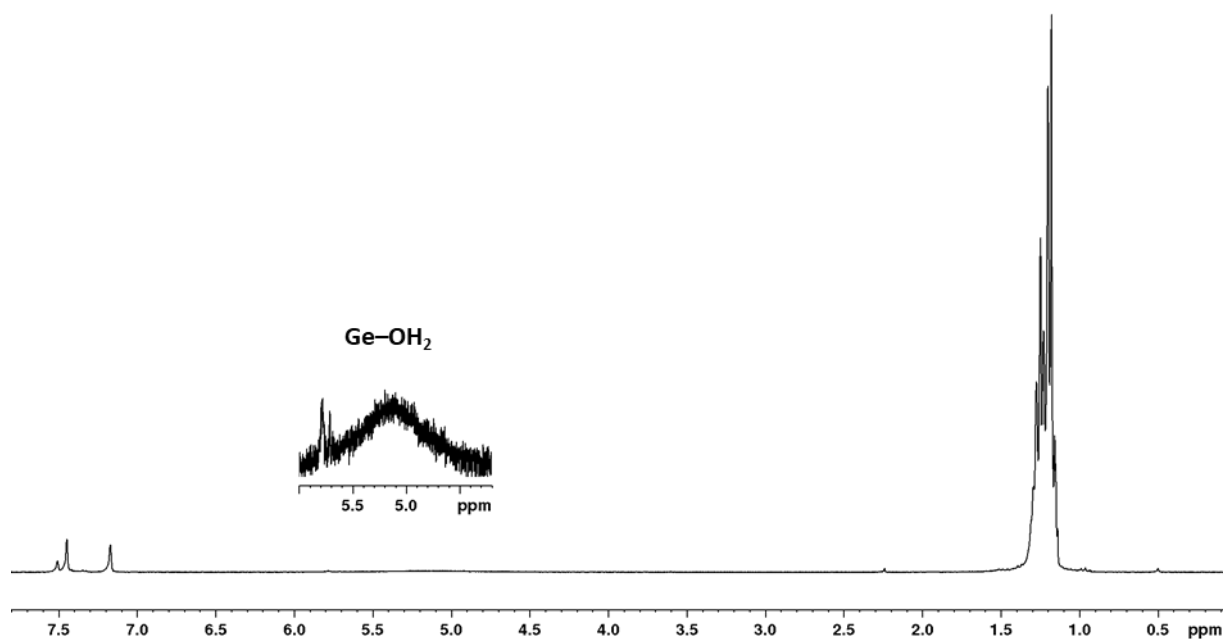

**Figure S13.**  $^1\text{H}$  NMR spectrum of  $[\text{Et}_3\text{Ge-OH}_2][\text{B}(\text{C}_6\text{F}_5)_4]$  (**3**) in *o*-dichlorobenzene- $\text{d}_4$ . Note that  $\text{C}_6\text{D}_6$  was not completely removed.

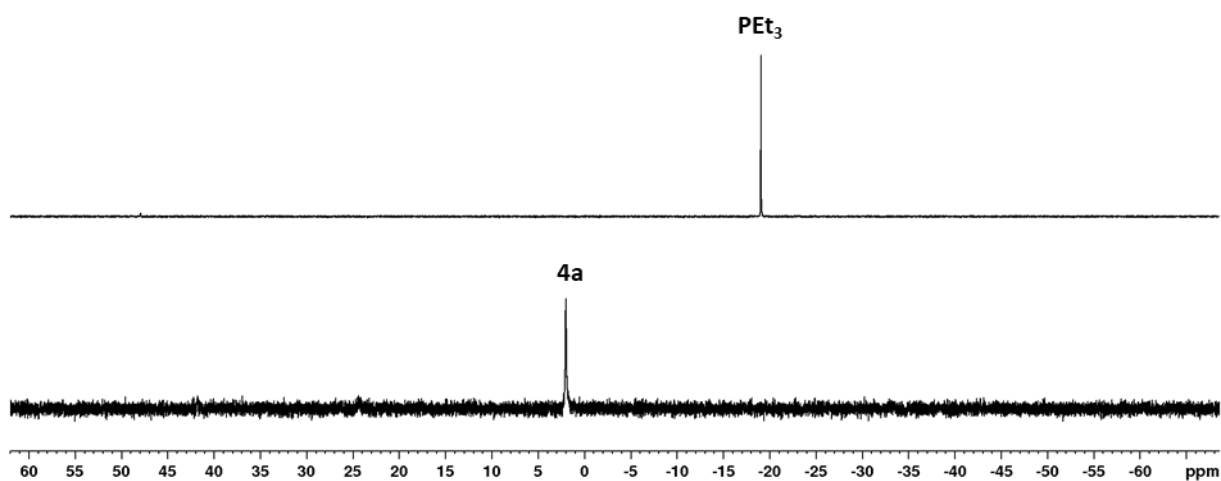

**Figure S14.**  $^{31}\text{P}\{^1\text{H}\}$  NMR spectra of  $[\text{Et}_3\text{Ge-PET}_3][\text{B}(\text{C}_6\text{F}_5)_4]$  (**4a**, bottom) and  $\text{PET}_3$  (top) in *o*-dichlorobenzene- $\text{d}_4$ .

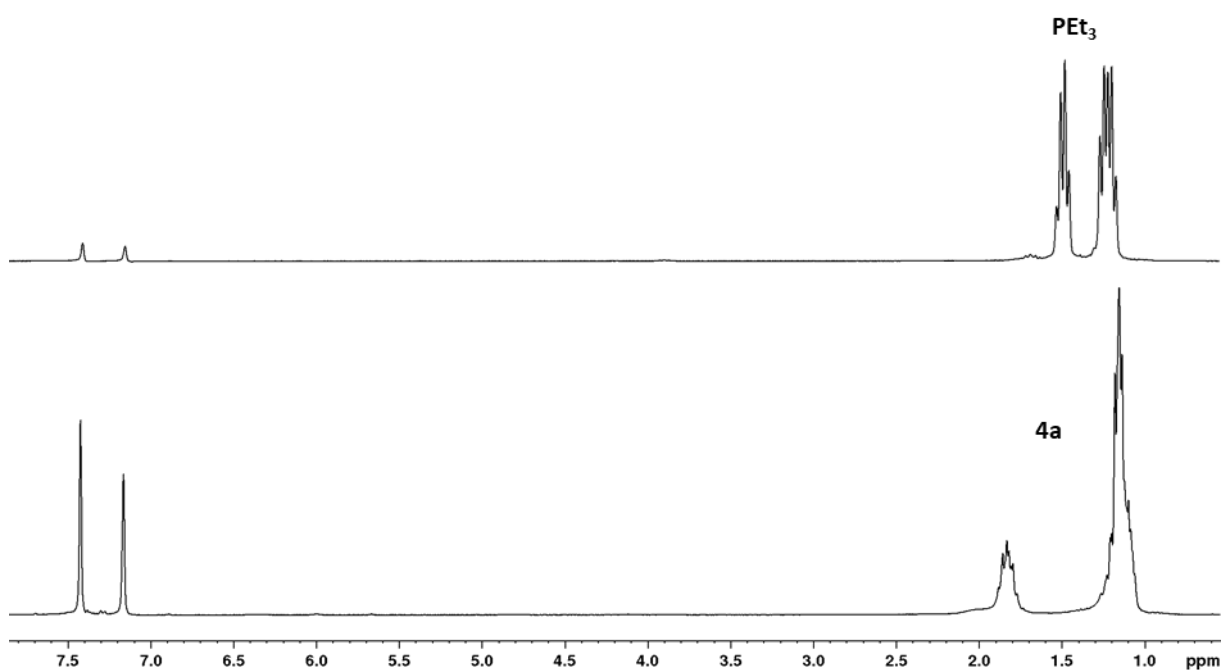

**Figure S15.**  $^1\text{H}$  NMR spectra of  $[\text{Et}_3\text{Ge-PET}_3][\text{B}(\text{C}_6\text{F}_5)_4]$  (**4a**, bottom) and free  $\text{PET}_3$  (top) in *o*-dichlorobenzene- $\text{d}_4$ .

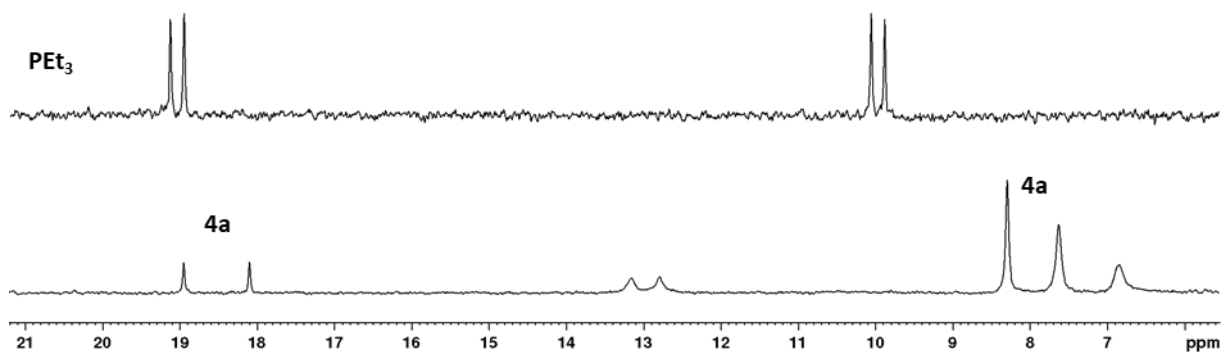

**Figure S16.**  $^{13}\text{C}\{^1\text{H}\}$  NMR spectra of  $[\text{Et}_3\text{Ge-PET}_3][\text{B}(\text{C}_6\text{F}_5)_4]$  (**4a**, bottom) and  $\text{PET}_3$  (top) in *o*-dichlorobenzene- $\text{d}_4$ .

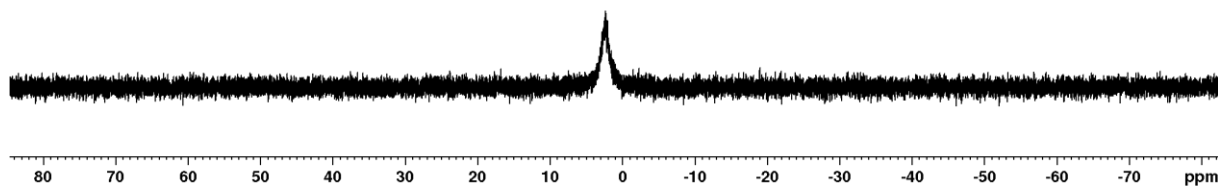

**Figure S17.**  $^{31}\text{P}\{^1\text{H}\}$  NMR spectrum of  $[\text{Et}_3\text{Ge-PPh}_3][\text{B}(\text{C}_6\text{F}_5)_4]$  (**4b**) in *o*-dichlorobenzene- $\text{d}_4$ .

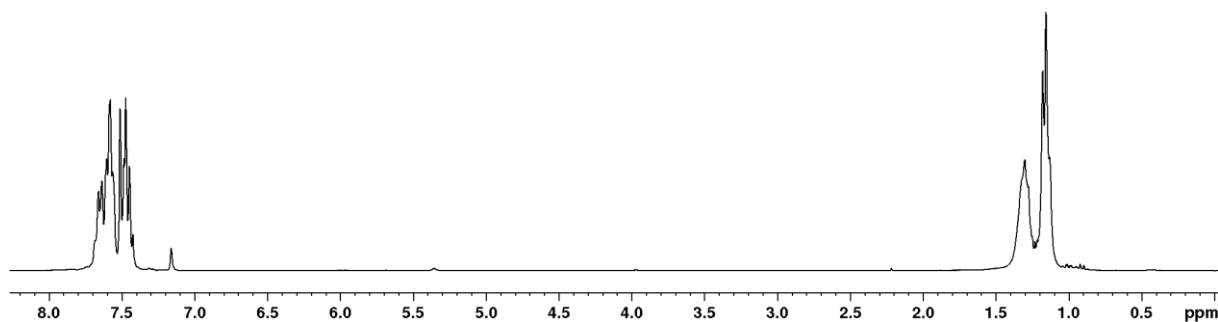

**Figure S18.**  $^1\text{H}$  NMR spectrum of  $[\text{Et}_3\text{Ge-PPh}_3][\text{B}(\text{C}_6\text{F}_5)_4]$  (**4b**) in *o*-dichlorobenzene- $\text{d}_4$ . Note that  $\text{C}_6\text{D}_6$  was not completely removed.

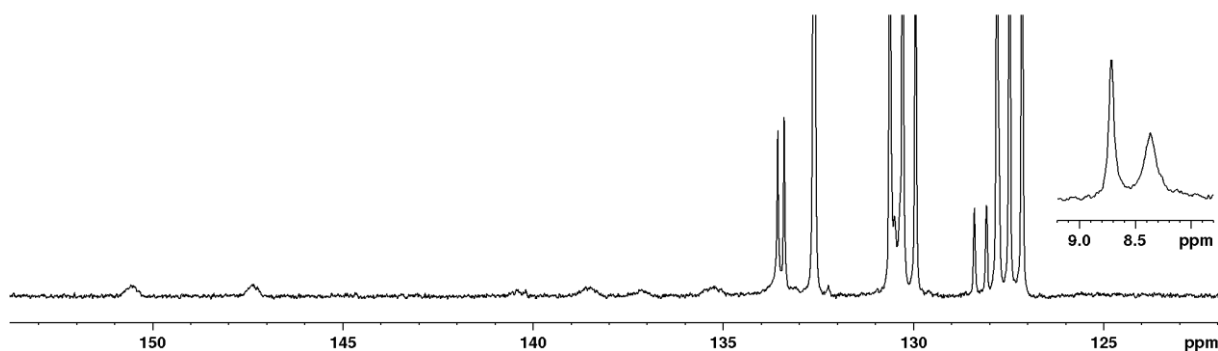

**Figure S19.**  $^{13}\text{C}\{^1\text{H}\}$  NMR spectrum of  $[\text{Et}_3\text{Ge-PPh}_3][\text{B}(\text{C}_6\text{F}_5)_4]$  (**4b**) in *o*-dichlorobenzene- $\text{d}_4$ . Note that  $\text{C}_6\text{D}_6$  was not completely removed.

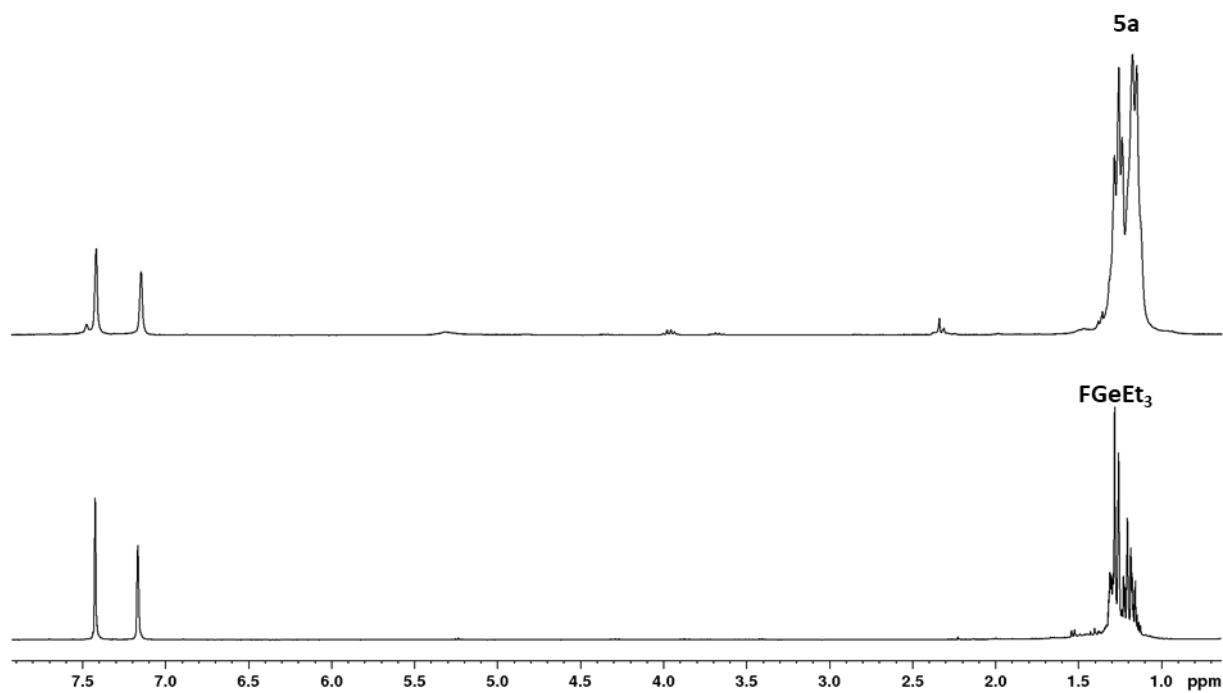

**Figure S20.**  $^1\text{H}$  NMR spectra of  $\text{Et}_3\text{GeF}$  (bottom) and  $[\text{Et}_3\text{GeFGeEt}_3][\text{B}(\text{C}_6\text{F}_5)_4]$  (**5a**, top) in *o*-dichlorobenzene- $\text{d}_4$ . Note that  $\text{C}_6\text{D}_6$  was not completely removed.

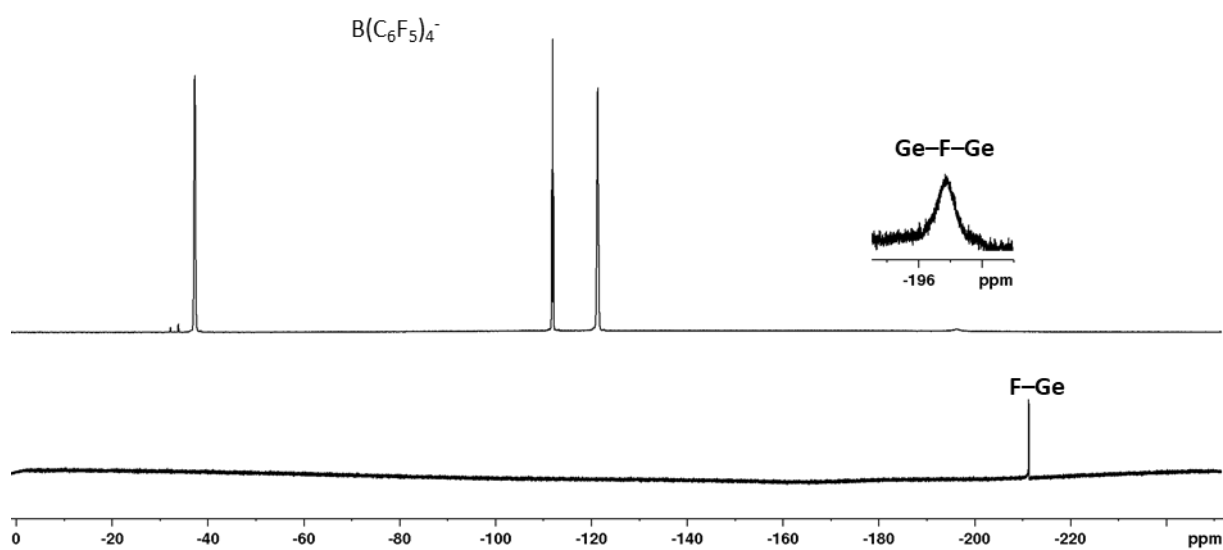

**Figure S21.**  $^{19}\text{F}$  NMR spectra of  $\text{Et}_3\text{GeF}$  (bottom) and  $[\text{Et}_3\text{GeFGeEt}_3][\text{B}(\text{C}_6\text{F}_5)_4]$  (**5a**, top) in *o*-dichlorobenzene- $\text{d}_4$ .

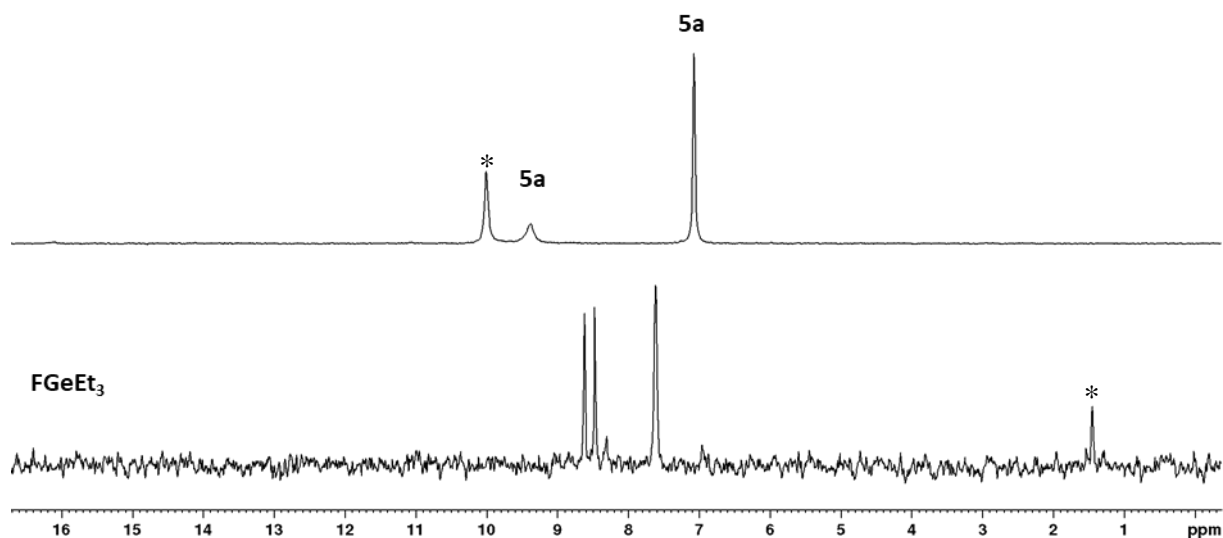

**Figure S22.** Section of the  $^{13}\text{C}\{^1\text{H}\}$  NMR spectra of  $\text{Et}_3\text{GeF}$  (bottom) and  $[\text{Et}_3\text{GeFGeEt}_3][\text{B}(\text{C}_6\text{F}_5)_4]$  (**5a**, top) in *o*-dichlorobenzene- $\text{d}_4$ . \* Impurity.

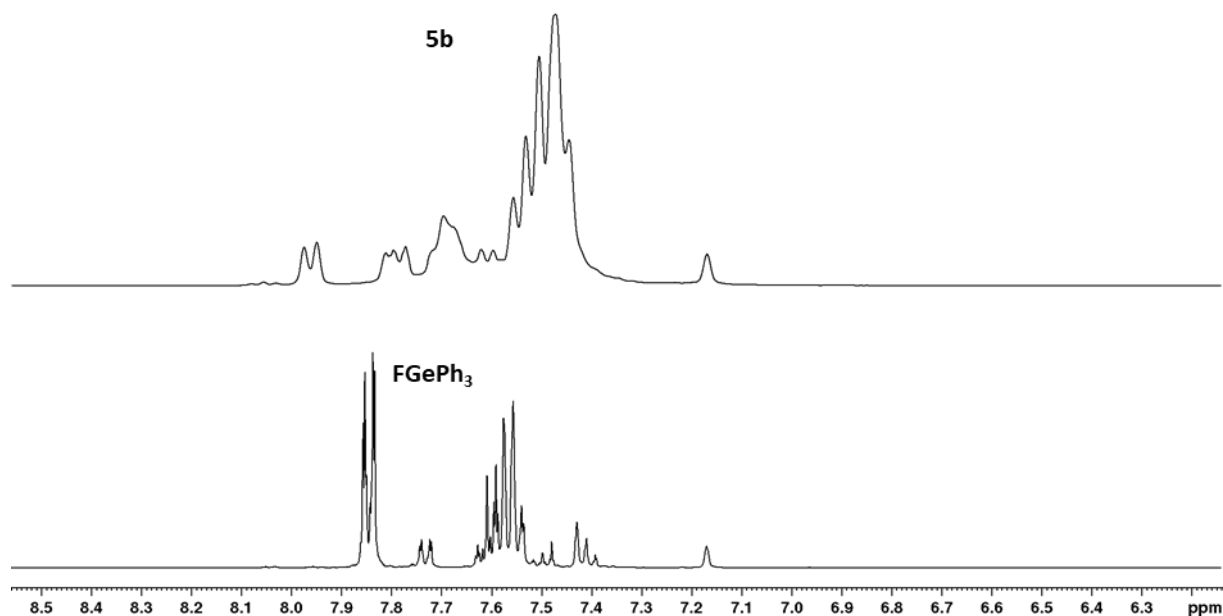

**Figure S23.**  $^1\text{H}$  NMR spectra of  $\text{Ph}_3\text{GeF}$  (bottom) and  $[\text{Ph}_3\text{GeFGePh}_3][\text{B}(\text{C}_6\text{F}_5)_4]$  (**5b**, top) in *o*-dichlorobenzene- $\text{d}_4$ . Note that  $\text{C}_6\text{D}_6$  was not completely removed.

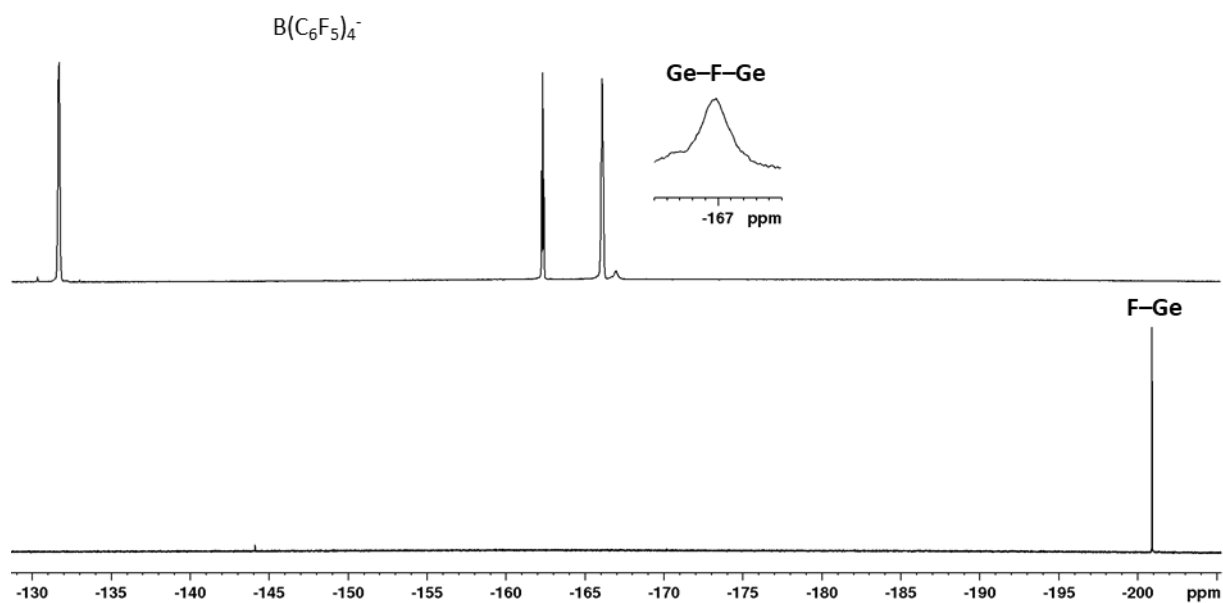

**Figure S24.**  $^{19}\text{F}$  NMR spectra of  $\text{Ph}_3\text{GeF}$  (bottom) and  $[\text{Ph}_3\text{GeFGePh}_3][\text{B}(\text{C}_6\text{F}_5)_4]$  (**5b**, top) in *o*-dichlorobenzene- $\text{d}_4$ .

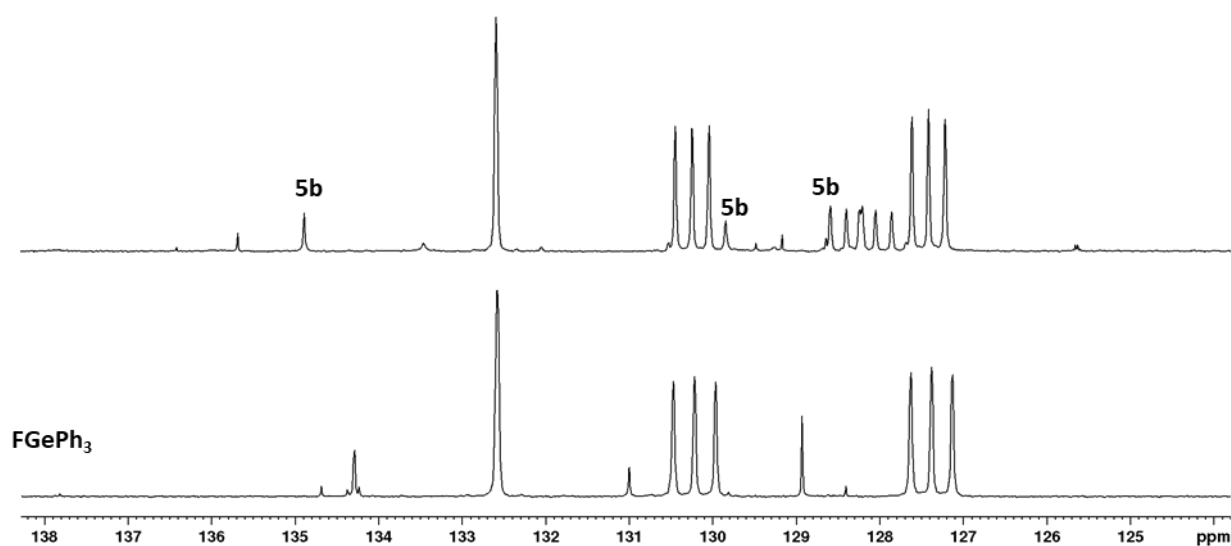

**Figure S25.**  $^{13}\text{C}\{^1\text{H}\}$  NMR spectra of  $\text{Ph}_3\text{GeF}$  (bottom) and  $[\text{Ph}_3\text{GeFGePh}_3][\text{B}(\text{C}_6\text{F}_5)_4]$  (**5b**, top) in *o*-dichlorobenzene- $\text{d}_4$ . Note that  $\text{C}_6\text{D}_6$  was not completely removed.



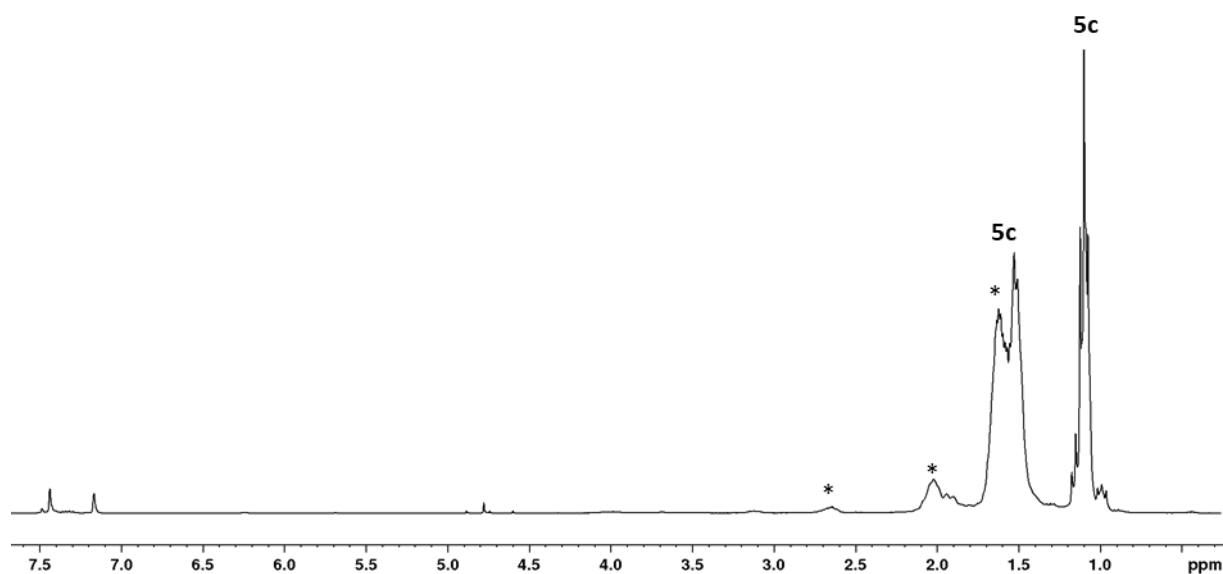

**Figure S26.**  $^1\text{H}$  NMR spectrum of the reaction of **2c** and fluorocyclohexane to form  $[\text{nBu}_3\text{Ge-F-GenBu}_3][\text{B}(\text{C}_6\text{F}_5)_4]$  (**5c**) in *o*-dichlorobenzene- $\text{d}_4$ . Note that  $\text{C}_6\text{D}_6$  was not completely removed. \* = 1,2-dichloro-4-cyclohexylbenzene- $\text{d}_3$ .

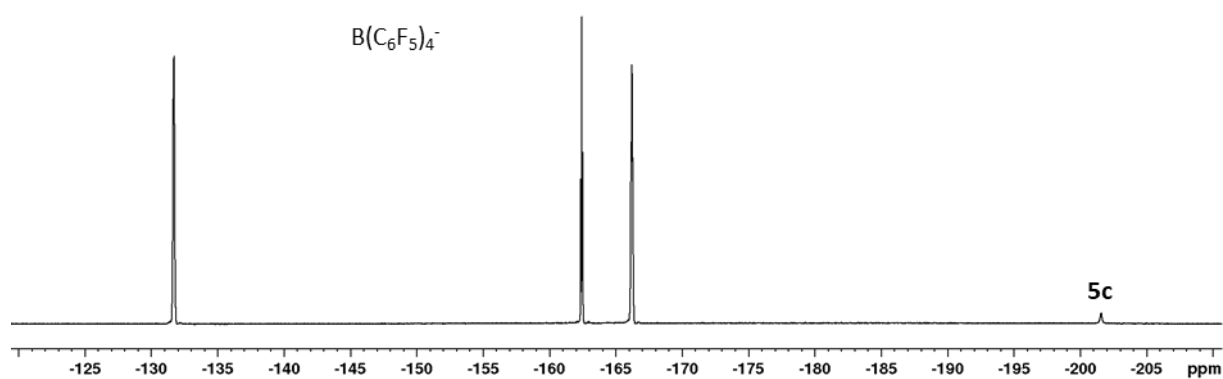

**Figure S27.**  $^{19}\text{F}$  NMR spectrum of the reaction of **2c** and fluorocyclohexane to form  $[\text{nBu}_3\text{Ge-F-GenBu}_3][\text{B}(\text{C}_6\text{F}_5)_4]$  (**5c**) in *o*-dichlorobenzene- $\text{d}_4$ .

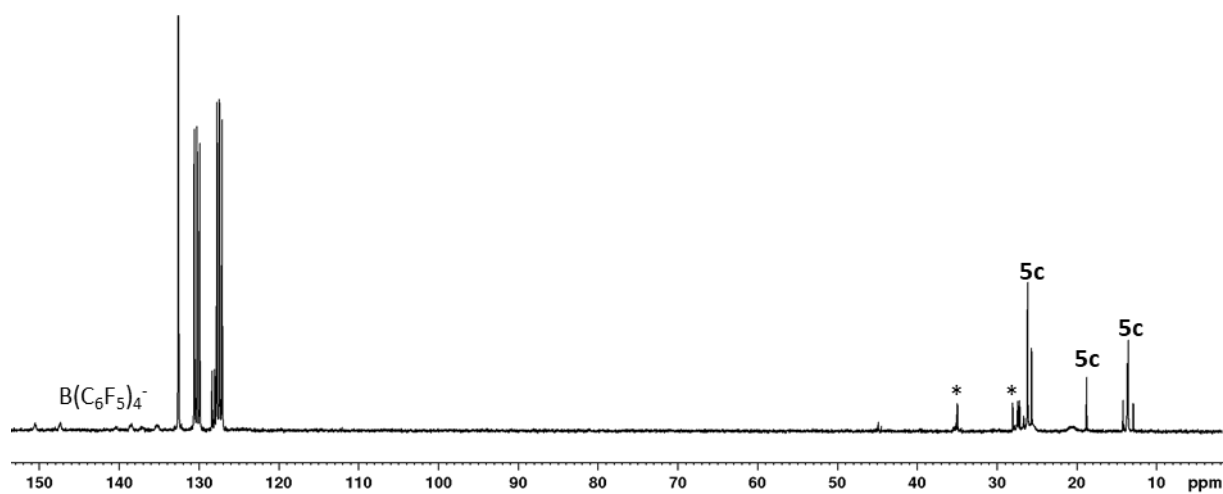

**Figure S28.**  $^{13}\text{C}\{^1\text{H}\}$  NMR spectrum of the reaction of **2c** and fluorocyclohexane to form  $[\text{nBu}_3\text{Ge-F-GenBu}_3][\text{B}(\text{C}_6\text{F}_5)_4]$  (**5c**) in *o*-dichlorobenzene- $\text{d}_4$ . Note that  $\text{C}_6\text{D}_6$  was not completely removed. \* = 1,2-dichloro-4-cyclohexylbenzene- $\text{d}_3$ .

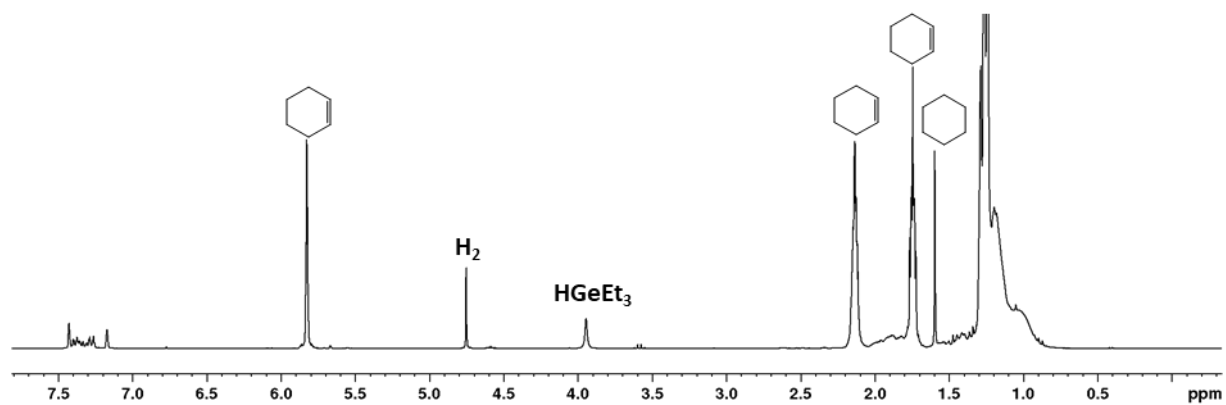

**Figure S29.**  $^1\text{H}$  NMR spectrum of the catalytic dehydrofluorination of fluorocyclohexane in *o*-dichlorobenzene- $\text{d}_4$ .

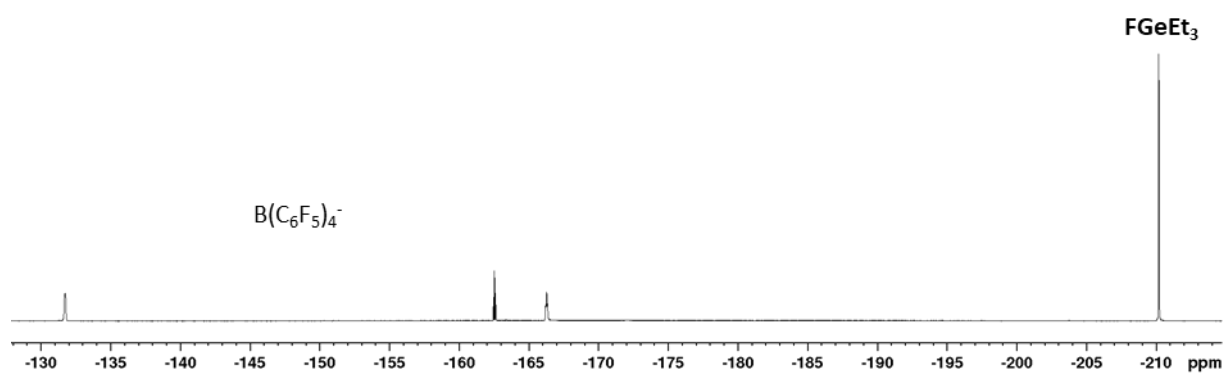

**Figure S30.**  $^{19}\text{F}$  NMR spectrum of the catalytic dehydrofluorination of fluorocyclohexane in *o*-dichlorobenzene- $\text{d}_4$ .

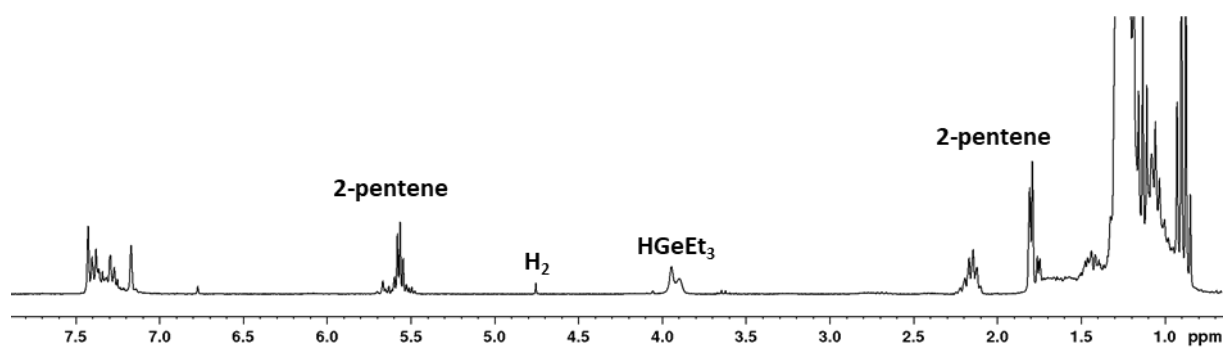

**Figure S31.**  $^1\text{H}$  NMR spectrum of the catalytic dehydrofluorination of fluoropentane in *o*-dichlorobenzene- $\text{d}_4$ .

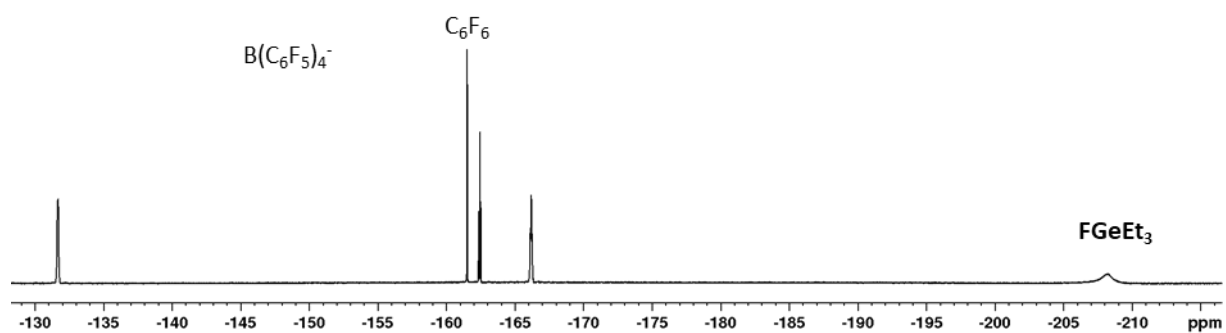

**Figure S32.**  $^{19}F$  NMR spectrum of the catalytic dehydrofluorination of fluoropentane in *o*-dichlorobenzene- $d_4$ .  $C_6F_6$  was used as standard.

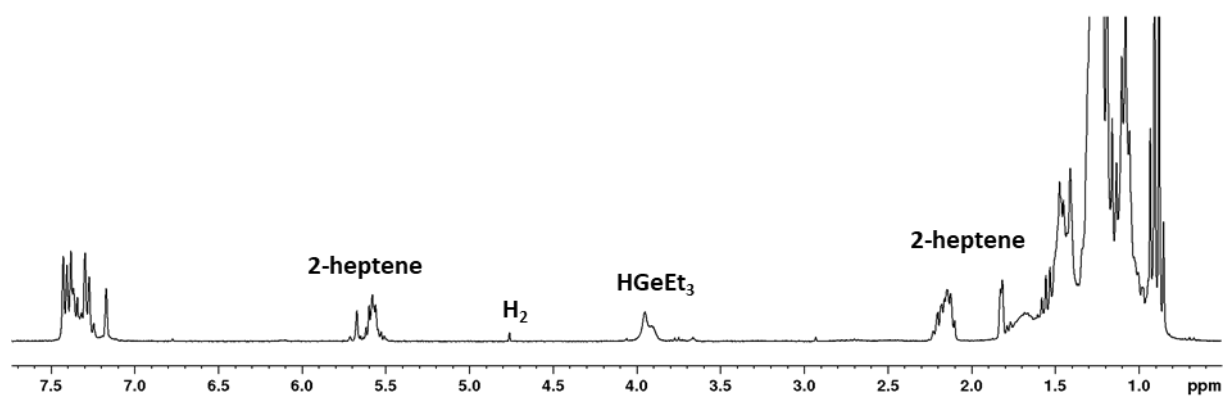

**Figure S33.**  $^1H$  NMR spectrum of the catalytic dehydrofluorination of fluoroheptane in *o*-dichlorobenzene- $d_4$ .

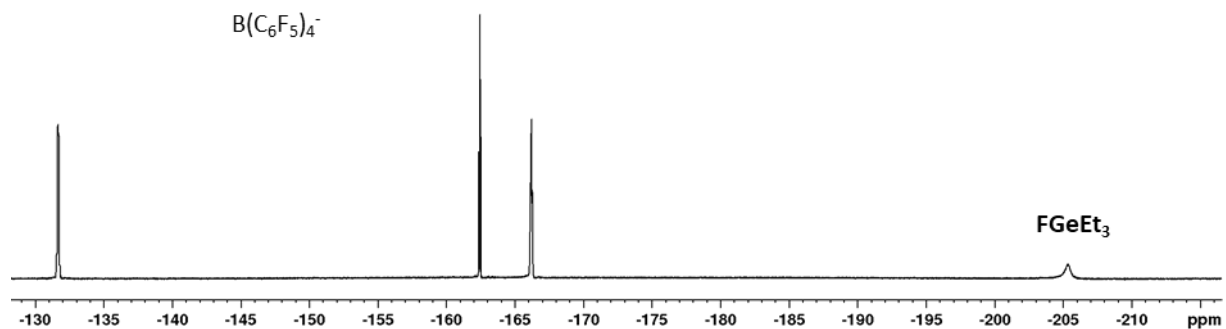

**Figure S34.**  $^{19}F$  NMR spectrum of the catalytic dehydrofluorination of fluoroheptane in *o*-dichlorobenzene- $d_4$ .

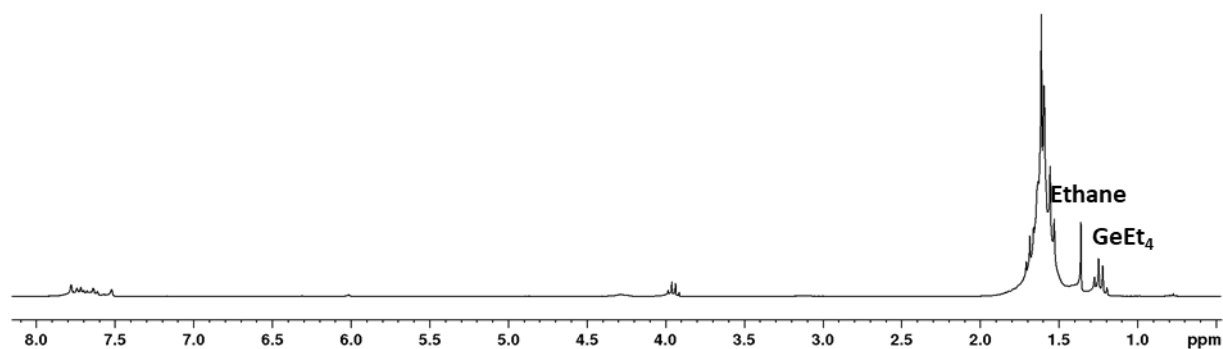

**Figure S35.**  $^1\text{H}$  NMR spectrum of the activation of fluoroethane in *o*-dichlorobenzene- $\text{d}_4$ .

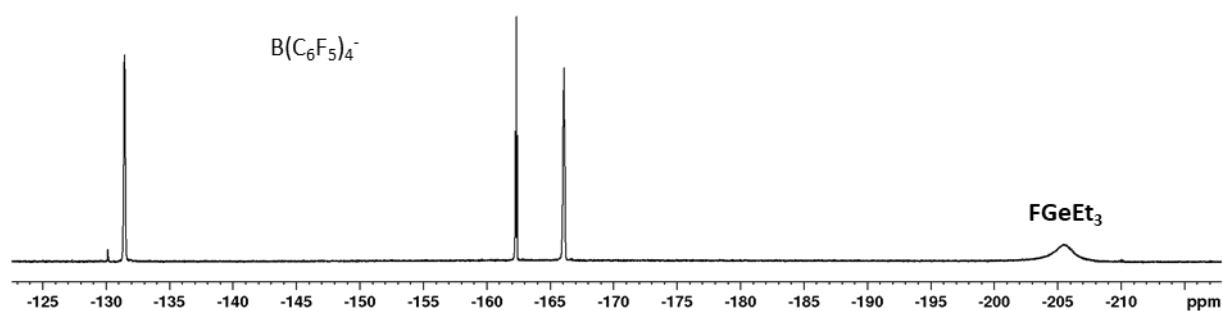

**Figure S36.**  $^{19}\text{F}$  NMR spectrum of the activation of fluoroethane in *o*-dichlorobenzene- $\text{d}_4$ .

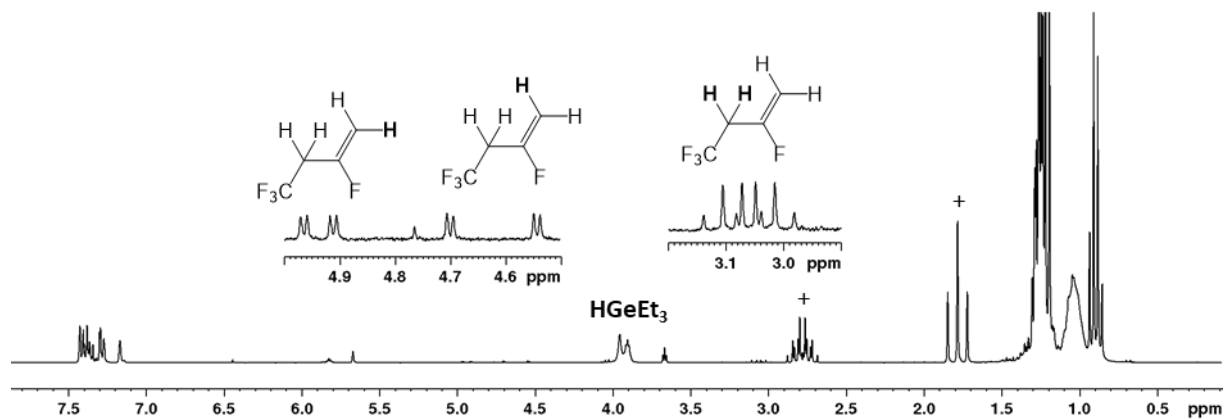

**Figure S37.**  $^1\text{H}$  NMR spectrum of the dehydrofluorination of 1,1,1,3,3-pentafluorobutane (+) in *o*-dichlorobenzene- $\text{d}_4$ .

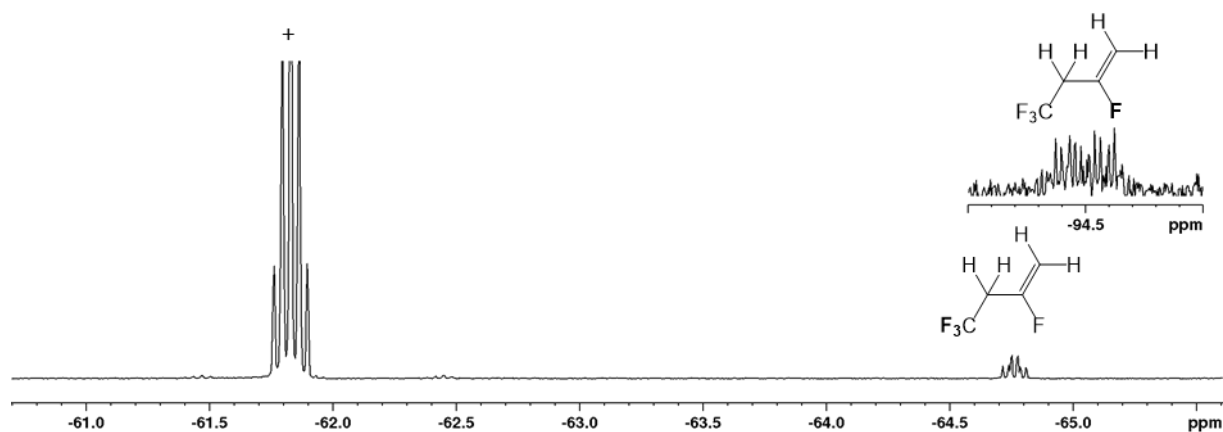

**Figure S38.** Section of the  $^{19}\text{F}$  NMR spectrum of the dehydrofluorination of 1,1,1,3,3-pentafluorobutane (+) in *o*-dichlorobenzene- $\text{d}_4$ .

## 7. References

- [1] S. Popov, B. Shao, A. L. Bagdasarian, T. R. Benton, L. Zou, Z. Yang, K. N. Houk and H. M. Nelson, *Science*, **2018**, *361*, 381-387.
- [2] G. M. Sheldrick, *SADABS*, Program for Empirical Absorption Correction, Version SADABS-2014/5, Bruker Analytical X-ray Systems, Madison, WI, USA, **2011**.
- [3] G. M. Sheldrick, *SHELXT-2014*, Program for Crystal Structure Solution, University of Göttingen, Germany, **2013**; G. M. Sheldrick, *SHELXL-2013*, Program for Crystal Structure Refinement, University of Göttingen, Germany, **2013**.
